# Supplementary material for: An assessment of prognostic immunity markers in breast cancer
Source: PubMed Central journal article supplement (PMC6206135; doi:10.1038/s41523-018-0088-0), 2018-10-29
Supplement: 41523_2018_88_MOESM1_ESM.pdf [file 41523_2018_88_MOESM1_ESM.pdf]

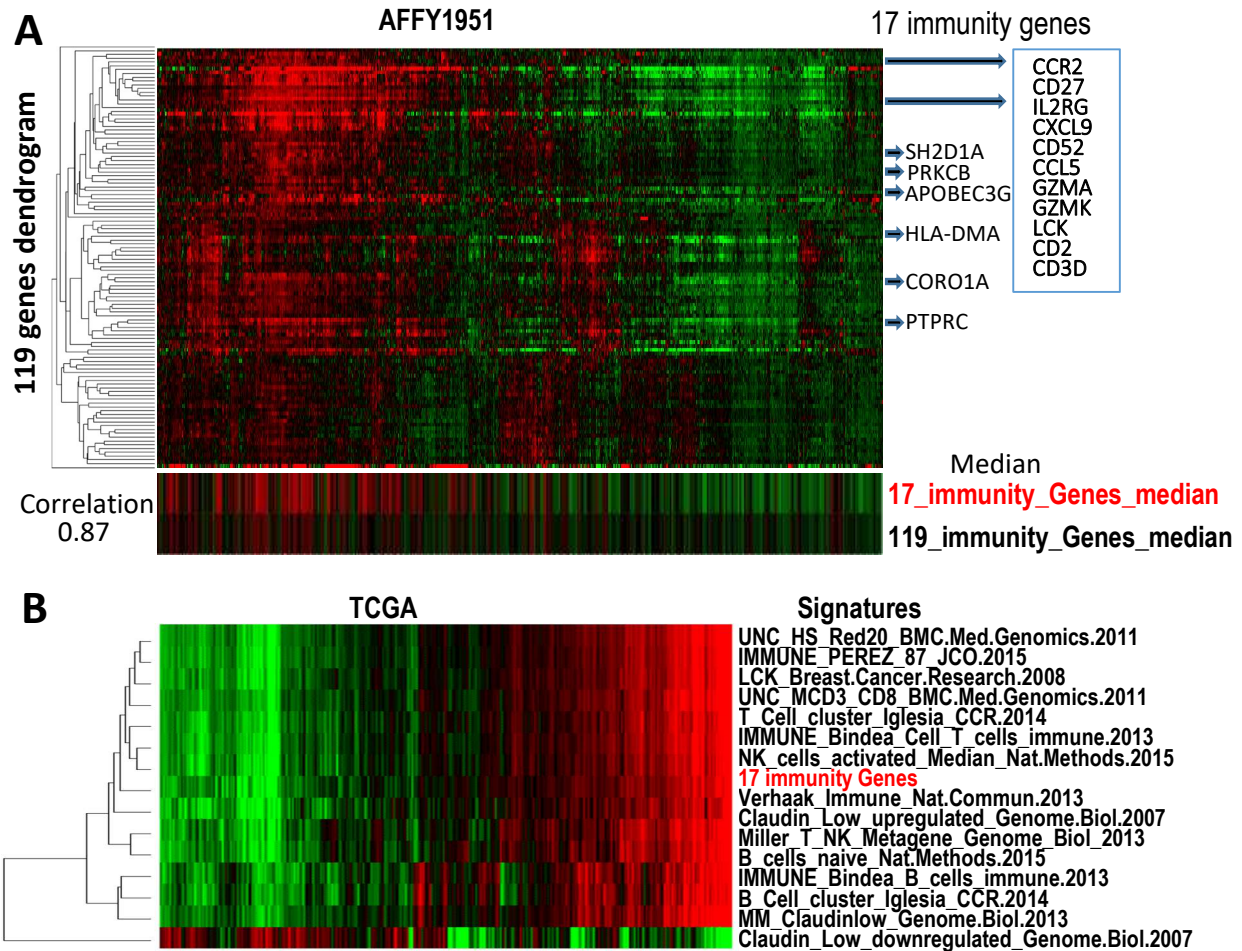

Supplementary Figure 1. Selection of 17 immunity genes from 119 significant immunity genes by EPIG and the correlation among 17 immunity gene signature and other published immunity signatures . (A) Distribution of the 17 immunity genes among the significant immunity genes. The correlation between the 17 immunity genes and 119 immunity genes was 0.87 (95%CI 0.86-0.88). (B) The 17 immunity genes in this study were positively correlated with 13 published immunity signatures, including UNC Claudin-low subtype up-regulated, with Person correlations between 0.88 and 0.94, but negatively correlated with UNC Claudin-low subtype down-regulated gene signature (-0.51, 95%CI -0.55 to -0.46).

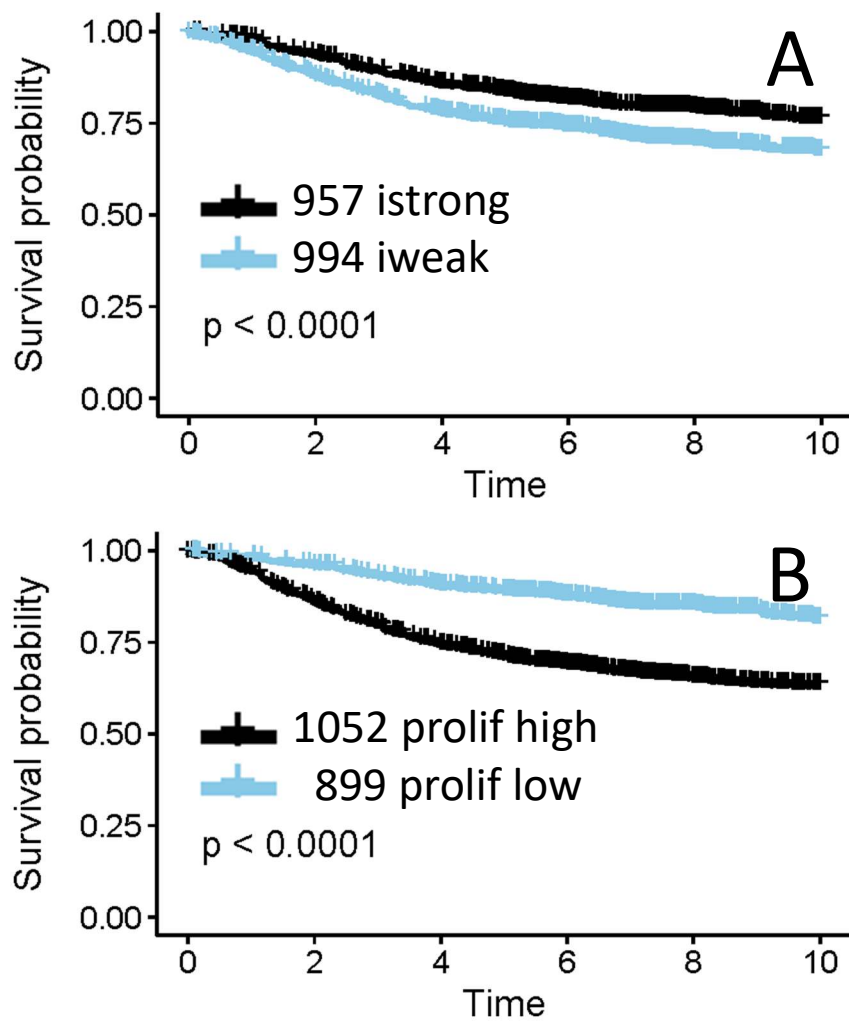

Supplementary Figure 2. Survival analysis of the immunity-strong group (istrong) and the immunity-weak group (iweak) (A), and proliferation high group and proliferation low group (B) in AFFY1951.

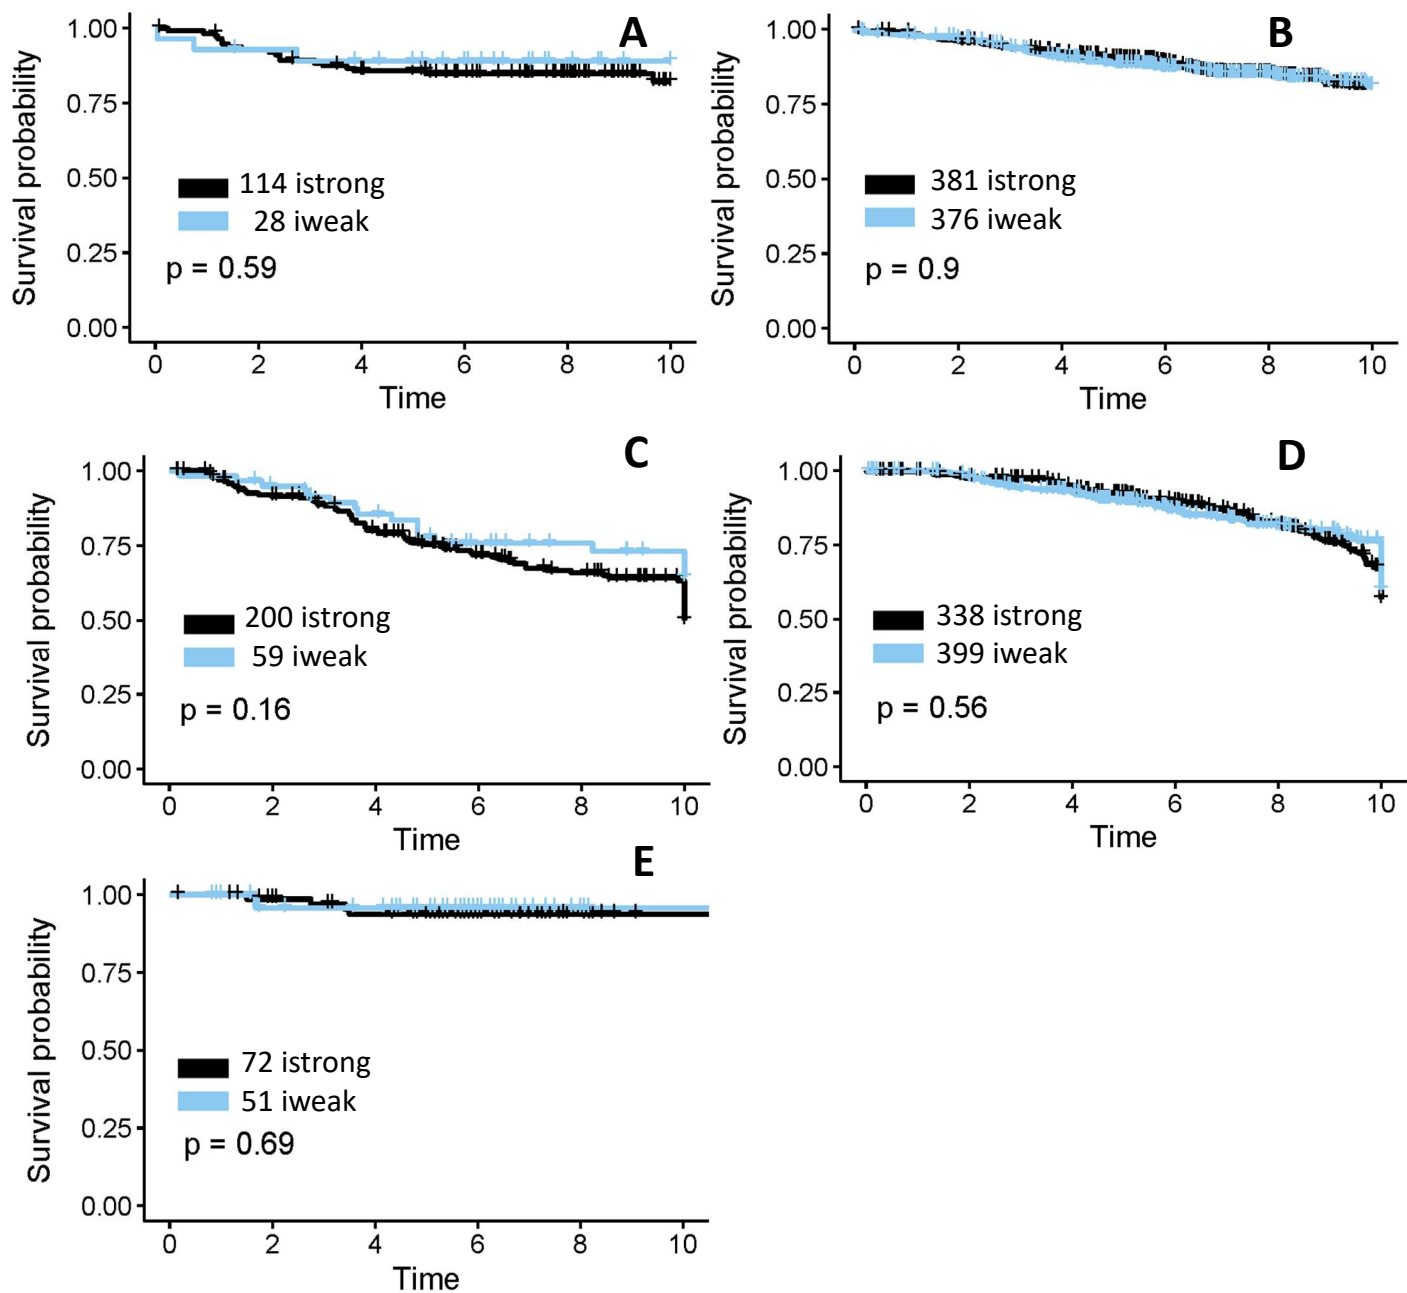

Supplementary Figure 3. Survival plots of Immunity Score in different patient groups identified by low proliferation only and ER status in three datasets. Immune Score demonstrated insignificant prognosis in low proliferation group in AFFY1951 ER-negative (A) ( $p=0.59$ ,  $n=142$ ) or ER-positive (B) ( $p=0.9$ ,  $n=757$ ), METABRIC ER-negative (C) ( $p=0.16$ ,  $n=259$ ) or ER-positive (D) ( $p=0.56$ ,  $n=737$ ), and TARGETSEQ ER-positive E) ( $p=0.69$ ,  $n=123$ ). Data was not shown for ER-negative and proliferation low group in TARGETSEQ dataset due to the low number of patients ( $n=18$  with only 1 istrong) in this group.





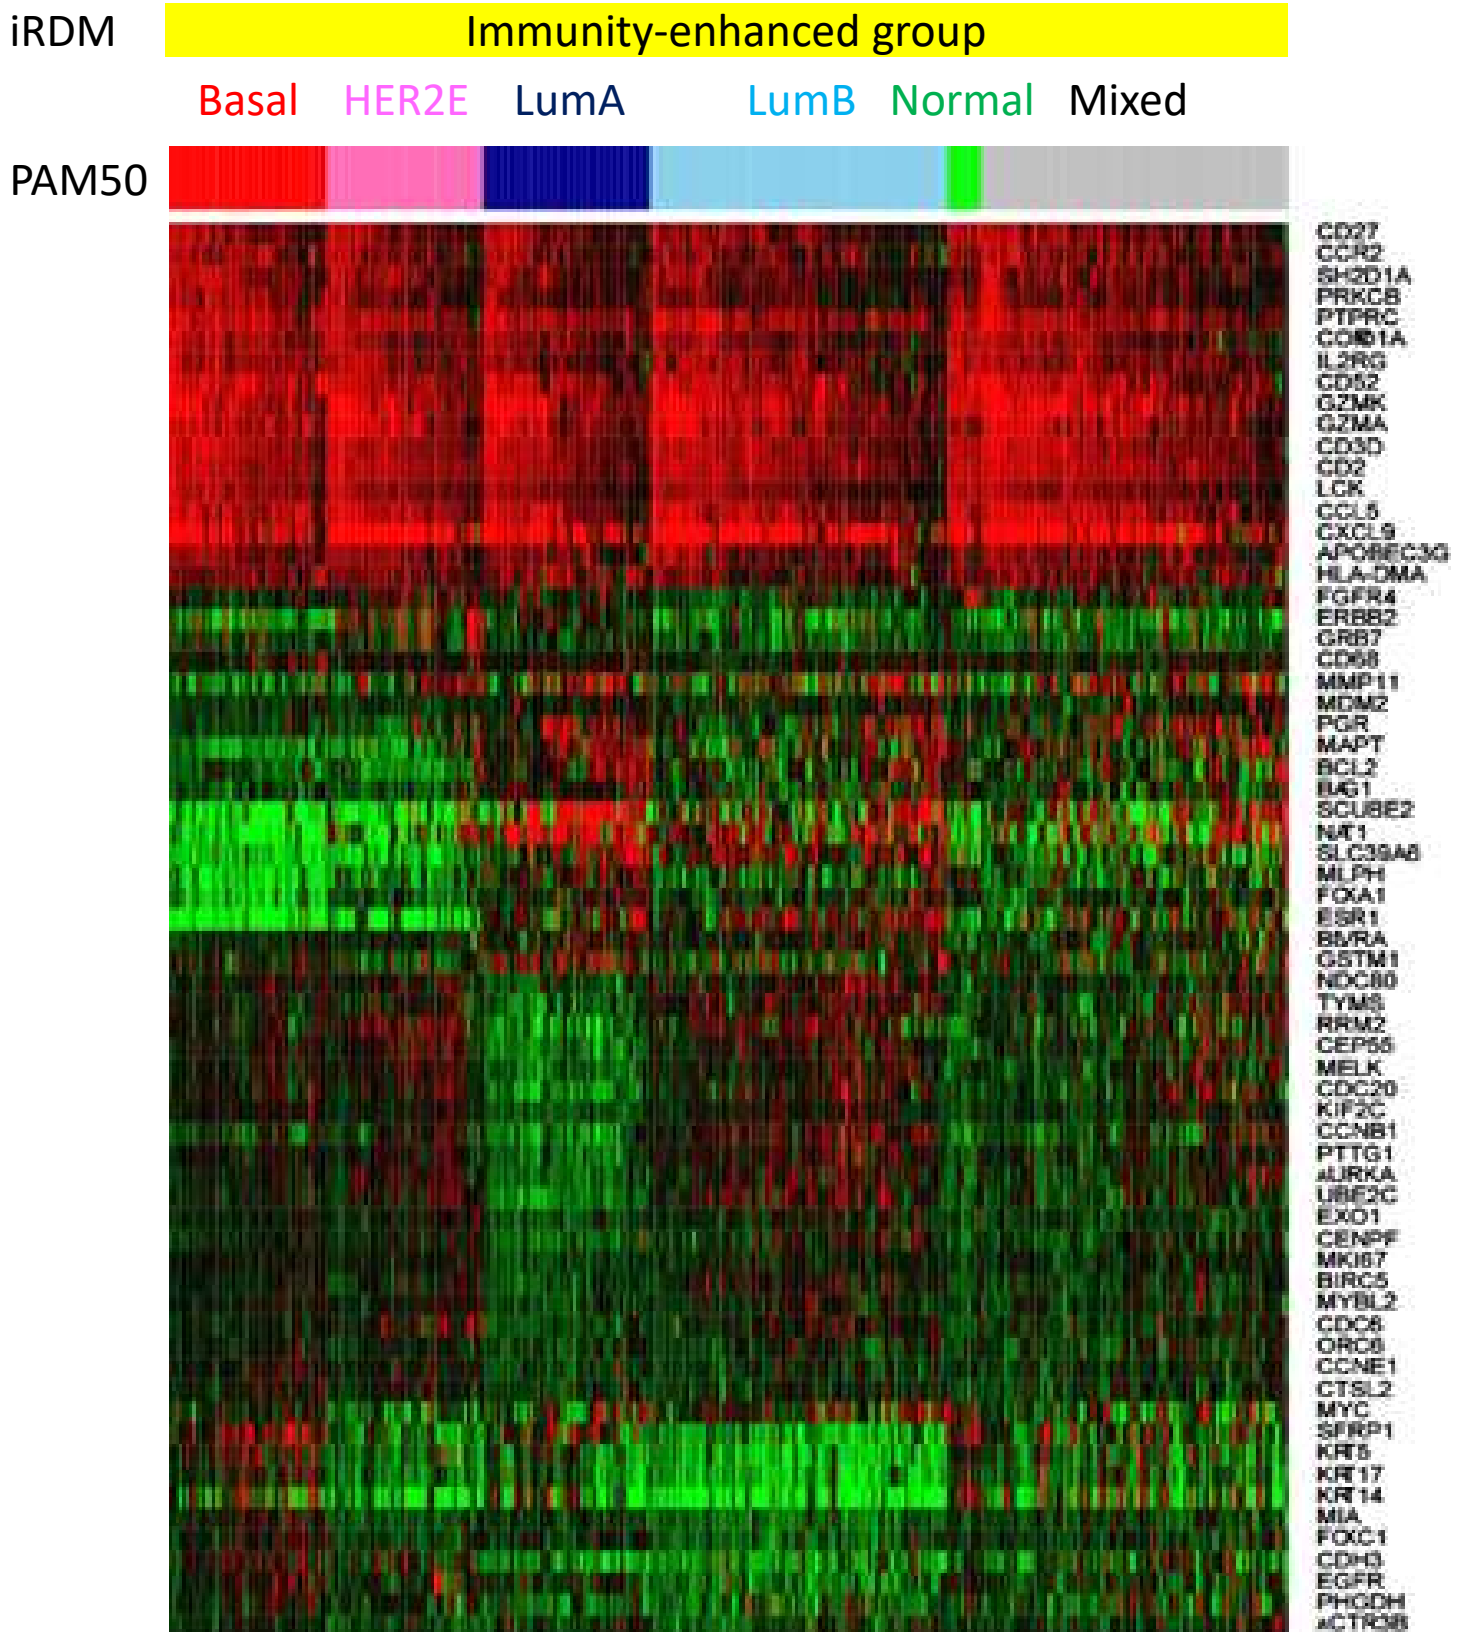

Supplementary Figure 5. Heatmap of the Affy1951 iRDM Immunity-enhanced group samples only (N=342) with samples ordered by PAM50 subtypes. PAM50 subtypes were color-coded. Gene clusters in the heatmap demonstrated that the 17 immunity genes were highly expressed in all PAM50 subtypes.

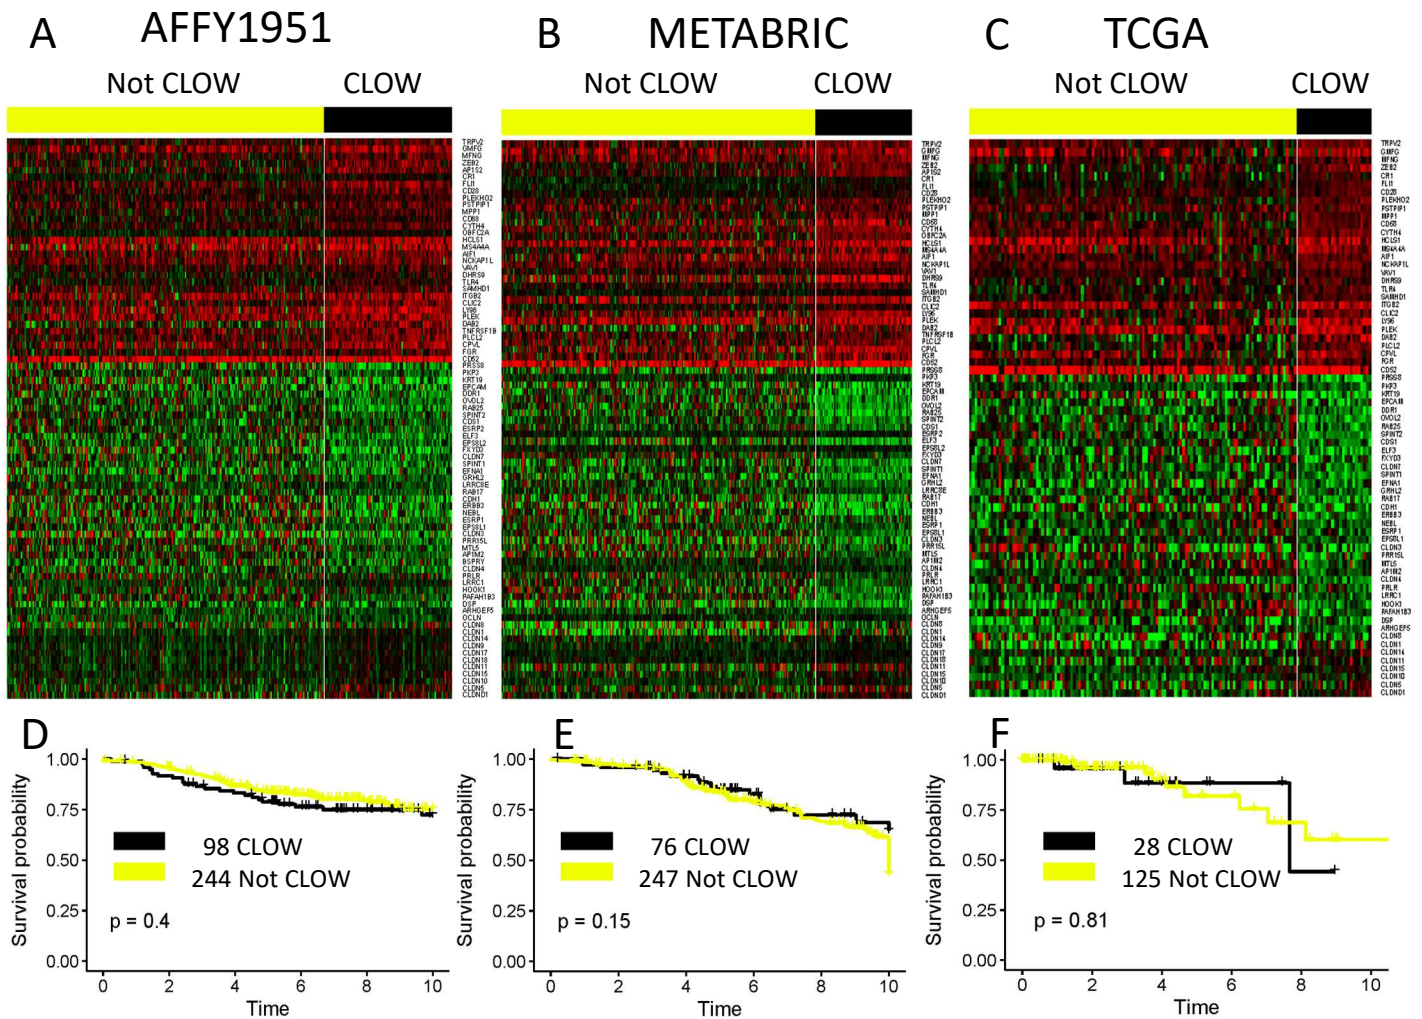

Supplementary Figure 6. Heatmap of the Claudin-low (CLOW) signature genes in the Immunity-enhanced subtype. Expression of the top 80 Claudin-low signature genes (Prat et al, BCR 2010)(fix this reference) identified less than 1/3 of Immunity-enhanced subtype samples as CLOW subtype (black color bar) in each of the three datasets (A-C). Not-CLOW (yellow color bar) and CLOW groups within the Immunity-enhanced subtype were highly correlated and had no difference in survival prognosis in AFFY1951 (D) ( $p=0.4$ ,  $n=342$ ), METABRIC (E) ( $p=0.15$ ,  $n=323$ ), TCGA (F) ( $p=0.81$ ,  $n=151$ ).

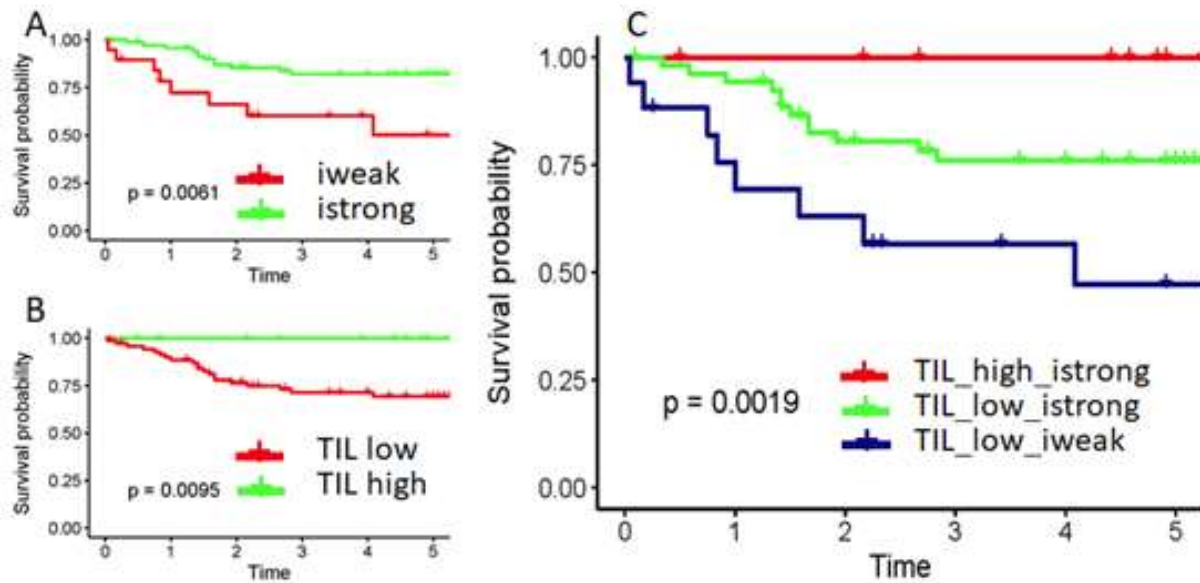

Supplementary Figure 7. Comparison of survival analysis with TILs percentage and immunity score. Kaplan-Meier plots were used to show Distant Metastasis-Free Survival (DMFS) based on immunity score only (A) ( $p=0.0061$ ,  $n=91$ ), TILs percentage only (B) ( $p=0.0095$ ,  $n=91$ ) and 3 groups of TILs and immunity scores (C) ( $p=0.0019$ ,  $n=89$ , Note: the 2 patients with “TIL\_high\_iweak” were excluded in this plot).



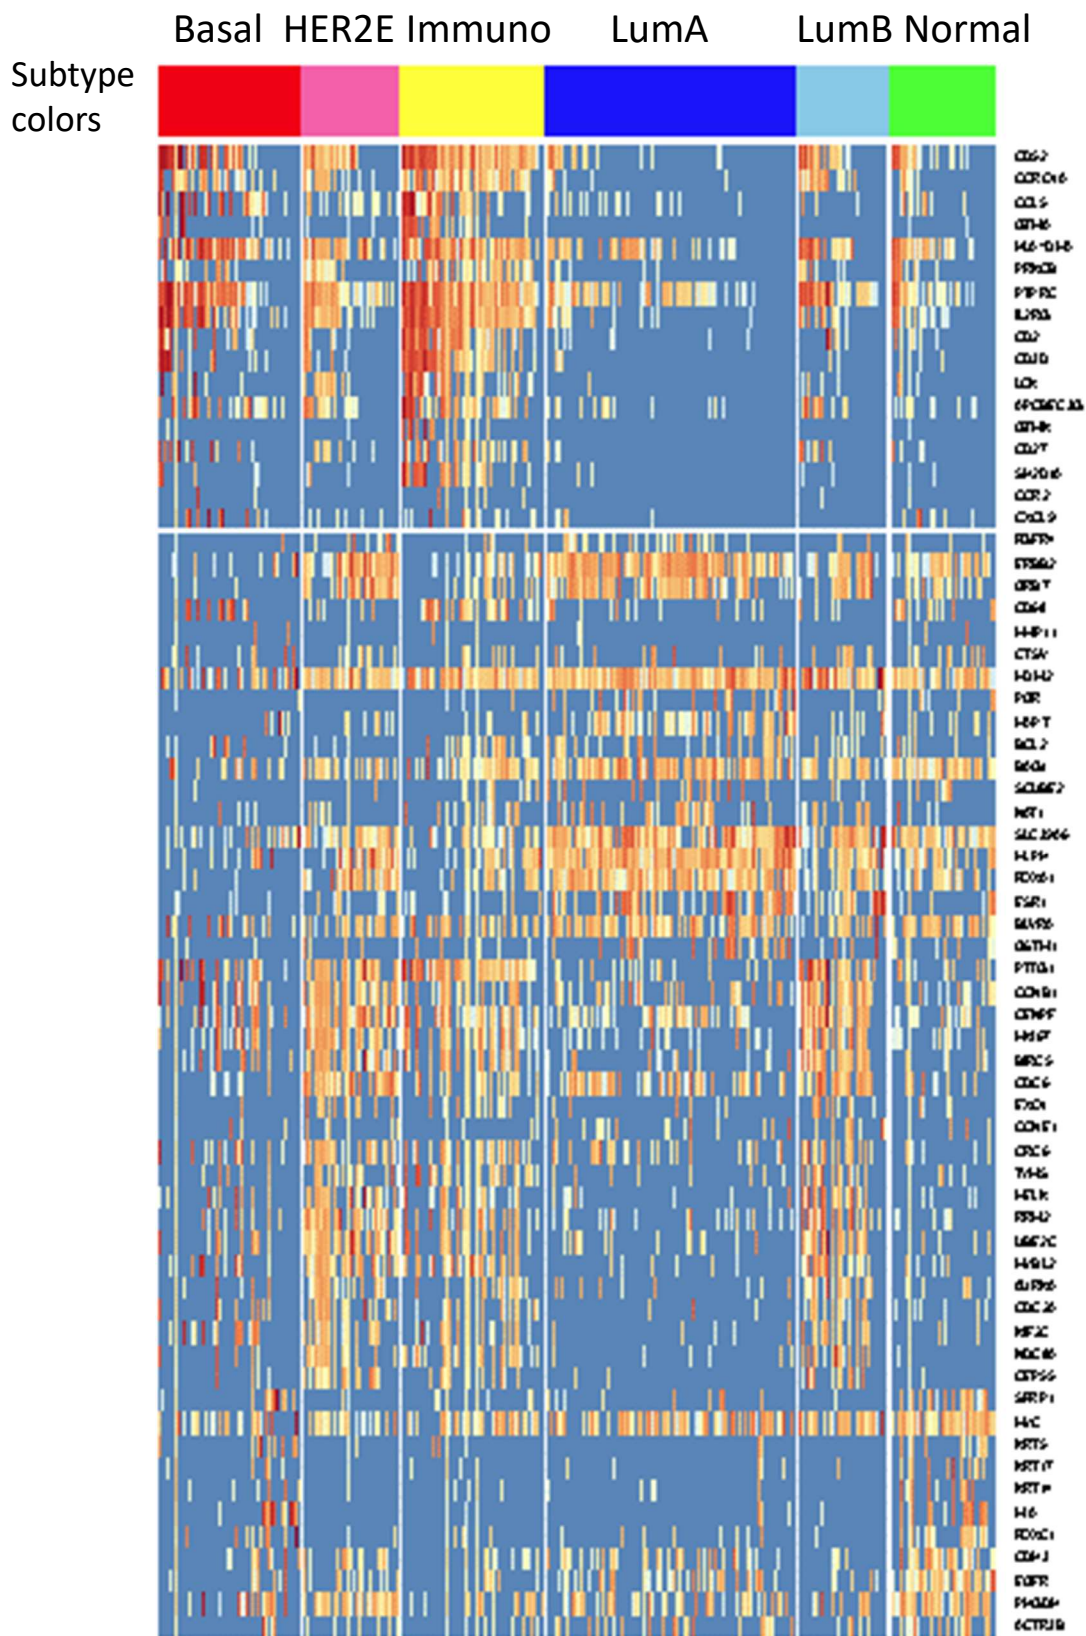

Supplementary Figure 8. Heatmap of individual cell's subtype using iRDM classification algorithm in which Mixed subtype was omitted. Color-coded individual cell subtypes: Basal-like (Red), HER2E (Hot Pink), Immuno (Yellow), Luminal A (Dark Blue), Luminal B (Sky Blue), Normal-like (Green).



Supplemental Table 1. Clinical characteristics of training dataset AFFY1951 breast cancer patients.

|                     |          | AFFY1951  |        |
|---------------------|----------|-----------|--------|
|                     |          | No.       | %      |
| <b>Age years</b>    |          | 56.8±13.2 |        |
|                     | <50      | 527       | 27%    |
|                     | ≥50      | 1029      | 53%    |
|                     | NA       | 395       | 20%    |
| <b>Lymph node</b>   | Negative | 1495      | 77%    |
|                     | Positive | 437       | 22%    |
|                     | NA       | 19        | 1%     |
| <b>Grade</b>        | I        | 235       | 12%    |
|                     | II       | 652       | 33%    |
|                     | III      | 576       | 30%    |
|                     | NA       | 488       | 25%    |
| <b>Size</b>         | ≤2cm     | 986       | 51%    |
|                     | >2cm     | 766       | 39%    |
|                     | NA       | 199       | 10%    |
| <b>ER</b>           | Negative | 399       | 20%    |
|                     | Positive | 1342      | 69%    |
|                     | NA       | 210       | 11%    |
| <b>HER2</b>         | Negative | NA        | NA     |
|                     | Positive | NA        | NA     |
| <b>Chemotherapy</b> | Yes      | 281       | 14%    |
|                     | No       | 1655      | 85.00% |
|                     | NA       | 15        | 1%     |

Supplemental Table 2.

EPIG significant 119 immunity genes

| 119 genes      | average            | cellHigh_immuLow_a | cellHigh_immuhigh_avdiff | score           |                 |
|----------------|--------------------|--------------------|--------------------------|-----------------|-----------------|
| CXCL9          | 8.881296067        | 7.705733512        | 9.883953748              | 2.17822         | 42.13858        |
| CCL5           | 7.527790167        | 6.702478966        | 8.239709729              | 1.537231        | 17.78876        |
| CD52           | 6.860428024        | 6.048098039        | 7.536509091              | 1.488411        | 15.19837        |
| PTPRC          | 7.104135005        | 6.323024777        | 7.758551834              | 1.435527        | 14.63976        |
| CD2            | 7.632617896        | 6.902300357        | 8.234991547              | 1.332691        | 13.55603        |
| GZMK           | 7.328120452        | 6.594784135        | 7.914896651              | 1.320113        | 12.77069        |
| CD3D           | 7.579391052        | 6.896737433        | 8.146519458              | 1.249782        | 11.83867        |
| LCK            | 6.771085644        | 6.082288235        | 7.316821691              | 1.234533        | 10.31963        |
| GZMA           | 6.117603245        | 5.419224777        | 6.671079107              | 1.251854        | 9.587136        |
| IL2RG          | 7.664152507        | 7.07873672         | 8.143615311              | 1.064879        | 8.690892        |
| CORO1A         | 7.400114848        | 6.805701961        | 7.886459171              | 1.080757        | 8.643602        |
| APOBEC3G       | 6.854390069        | 6.297092513        | 7.299986922              | 1.002894        | 6.894126        |
| CCR2           | 5.820885349        | 5.273706952        | 6.259633174              | 0.985926        | 5.658195        |
| CD27           | 6.532586627        | 6.030417112        | 6.919514673              | 0.889098        | 5.163974        |
| PRKCB          | 6.155890954        | 5.660757754        | 6.54393445               | 0.883177        | 4.801602        |
| SH2D1A         | 5.573901672        | 5.407783244        | 5.694282137              | 0.286499        | 0.457515        |
| <b>HLA-DMA</b> | <b>8.704678073</b> | <b>8.675562032</b> | <b>8.741313078</b>       | <b>0.065751</b> | <b>0.037632</b> |
| TRBC1          | 7.795880629        | 6.821183244        | 8.603487879              | 1.782305        | 24.76447        |
| LYZ            | 9.321175221        | 8.572738324        | 9.993427911              | 1.42069         | 18.81348        |
| CCL19          | 7.577187119        | 6.754179679        | 8.25994992               | 1.50577         | 17.18009        |
| XCL1           | 5.56903235         | 4.644604456        | 6.323886443              | 1.679282        | 15.7046         |
| LAMP3          | 6.519647099        | 5.810331194        | 7.110577352              | 1.300246        | 11.02238        |
| SLAMF8         | 6.586710619        | 5.932955258        | 7.138169537              | 1.205214        | 9.56747         |
| CD48           | 7.988642085        | 7.405241711        | 8.47075949               | 1.065518        | 9.06973         |
| C1QA           | 8.56562527         | 8.023713904        | 9.036531738              | 1.012818        | 8.786618        |
| IL7R           | 7.25845703         | 6.669098752        | 7.752551356              | 1.083453        | 8.520482        |
| LTB            | 7.202739626        | 6.627903922        | 7.685364753              | 1.057461        | 8.054272        |
| SELL           | 6.452876106        | 5.824157932        | 6.940019617              | 1.115862        | 8.034781        |
| PLAC8          | 6.121699017        | 5.513721034        | 6.598760128              | 1.085039        | 7.207136        |
| RAC2           | 8.840514258        | 8.342972014        | 9.237388357              | 0.894416        | 7.07224         |
| CD8A           | 7.492474926        | 6.949113012        | 7.916800638              | 0.967688        | 7.016098        |
| EVI2B          | 6.504481023        | 5.931199465        | 6.966726635              | 1.035527        | 6.974862        |
| CYTIP          | 5.819824287        | 5.208809091        | 6.303160128              | 1.094351        | 6.969846        |
| CSF2RB         | 6.682442675        | 6.126813547        | 7.147177671              | 1.020364        | 6.957378        |
| HCLS1          | 7.587598623        | 7.065409804        | 8.018990431              | 0.953581        | 6.899525        |
| IRF8           | 7.575857424        | 7.059678966        | 7.996013238              | 0.936334        | 6.64192         |
| GZMB           | 5.337810324        | 4.734463815        | 5.79995327               | 1.065489        | 6.059844        |
| CCR7           | 5.799630777        | 5.217302317        | 6.239142424              | 1.02184         | 6.055726        |
| IL10RA         | 7.213887709        | 6.71096328         | 7.62658756               | 0.915624        | 6.047891        |
| PLEK           | 7.271571288        | 6.78511533         | 7.66816571               | 0.88305         | 5.670211        |
| TRAC           | 7.705717502        | 7.231694652        | 8.085469856              | 0.853775        | 5.616945        |
| RUNX3          | 6.42473176         | 5.934492513        | 6.847080223              | 0.912588        | 5.350622        |
| TRAF3IP3       | 5.938131268        | 5.40557451         | 6.354653429              | 0.949079        | 5.348776        |

|          |                    |                    |                    |                 |                 |
|----------|--------------------|--------------------|--------------------|-----------------|-----------------|
| MS4A6A   | 8.262794199        | 7.835839929        | 8.625484051        | 0.789644        | 5.152165        |
| IL2RB    | 7.587283874        | 7.126831907        | 7.950180064        | 0.823348        | 5.143436        |
| XCL2     | <b>5.572395772</b> | <b>5.033894474</b> | <b>5.983404147</b> | <b>0.94951</b>  | <b>5.023897</b> |
| NKG7     | 5.778787021        | 5.253638503        | 6.184705263        | 0.931067        | 5.009546        |
| IGHG1    | 6.587915831        | 6.093804278        | 6.960302073        | 0.866498        | 4.946329        |
| CD37     | 6.290297443        | 5.798995544        | 6.684224083        | 0.885229        | 4.929263        |
| TFEC     | 5.1728647          | 4.628177362        | 5.604133652        | 0.975956        | 4.927105        |
| SAMSN1   | 5.560036578        | 5.038290909        | 5.976263955        | 0.937973        | 4.891684        |
| GMFG     | 7.518549066        | 7.079934938        | 7.880639394        | 0.800704        | 4.82035         |
| SPOCK2   | 7.207979548        | 6.761451515        | 7.576785008        | 0.815333        | 4.791639        |
| GIMAP4   | 7.264250836        | 6.830286809        | 7.61834992         | 0.788063        | 4.511416        |
| KLRK1    | 6.889517994        | 6.438042781        | 7.245309091        | 0.807266        | 4.489753        |
| LPXN     | 7.746697443        | 7.32299287         | 8.083051834        | 0.760059        | 4.475187        |
| SASH3    | 7.170318879        | 6.737637433        | 7.521033971        | 0.783397        | 4.400497        |
| ARHGAP15 | 6.990854474        | 6.553126203        | 7.339731898        | 0.786606        | 4.325581        |
| PTPRCAP  | 6.707775713        | 6.254457219        | 7.046390431        | 0.791933        | 4.206837        |
| LCP2     | 7.113811898        | 6.692862923        | 7.459373844        | 0.766511        | 4.179642        |
| FYB      | 6.447662045        | 6.001651337        | 6.804338118        | 0.802687        | 4.154268        |
| DOCK2    | 6.134432055        | 5.682724777        | 6.498701595        | 0.815977        | 4.084416        |
| TNFAIP8  | 6.963164503        | 6.533438859        | 7.296220096        | 0.762781        | 4.051414        |
| CCR5     | 7.945388987        | 7.55002549         | 8.261048325        | 0.711023        | 4.016819        |
| WIPF1    | <b>7.343400688</b> | <b>6.934990553</b> | <b>7.674235407</b> | <b>0.739245</b> | <b>4.013043</b> |
| RNASE6   | 7.321141101        | 6.921656684        | 7.661933652        | 0.740277        | 4.012058        |
| ITK      | 5.598348869        | 5.128649733        | 5.943720415        | 0.815071        | 3.719208        |
| PIK3CD   | 7.138927827        | 6.747414795        | 7.459578947        | 0.712164        | 3.620706        |
| CD247    | 6.291976106        | 5.868597326        | 6.625066507        | 0.756469        | 3.600556        |
| CST7     | 6.395273746        | 5.974551515        | 6.72413748         | 0.749586        | 3.593371        |
| SLA      | 7.718620747        | 7.345827094        | 8.017780861        | 0.671954        | 3.485126        |
| GPR171   | 5.250843658        | 4.784606417        | 5.593155183        | 0.808549        | 3.432745        |
| PRF1     | 6.402095772        | 5.999589661        | 6.707936523        | 0.708347        | 3.212285        |
| ARHGAP25 | 6.674330088        | 6.288845098        | 6.978645455        | 0.6898          | 3.17581         |
| AIF1     | 8.848290659        | 8.528689661        | 9.120409729        | 0.59172         | 3.098075        |
| SEMA4D   | 7.126236775        | 6.759564171        | 7.415976715        | 0.656413        | 3.070535        |
| PVRIG    | 6.425590757        | 6.060007843        | 6.709023285        | 0.649015        | 2.706594        |
| TNFRSF1B | 6.640579056        | 6.291607843        | 6.92482823         | 0.63322         | 2.66266         |
| GIMAP5   | 8.061809046        | 7.742344563        | 8.312354864        | 0.57001         | 2.619376        |
| KLRB1    | 5.936493805        | 5.567783244        | 6.222775279        | 0.654992        | 2.546842        |
| NCKAP1L  | 7.130139921        | 6.803570588        | 7.398182616        | 0.594612        | 2.520957        |
| INPP5D   | 7.144708063        | 6.811960428        | 7.402840989        | 0.590881        | 2.494502        |
| SELPLG   | 6.99029469         | 6.664905169        | 7.255625518        | 0.59072         | 2.439267        |
| NCF4     | 5.325611996        | 4.956713012        | 5.624498565        | 0.667786        | 2.37489         |
| LST1     | 7.370344051        | 7.066526203        | 7.626305263        | 0.559779        | 2.309516        |
| ACAP1    | 5.93509705         | 5.581861854        | 6.202281659        | 0.62042         | 2.284542        |
| CD3E     | 6.862377483        | 6.542250802        | 7.117932695        | 0.575682        | 2.274258        |
| STAT4    | 6.167154769        | 5.826466845        | 6.422362041        | 0.595895        | 2.189902        |
| GPR18    | 4.753309145        | 4.367512656        | 5.036049282        | 0.668537        | 2.12445         |
| CD97     | 6.867657817        | 6.564857219        | 7.12053748         | 0.55568         | 2.120599        |



|                 |                    |                    |                    |                 |                 |
|-----------------|--------------------|--------------------|--------------------|-----------------|-----------------|
| BIN2            | 6.461629695        | 6.13912549         | 6.711647209        | 0.572522        | 2.118           |
| IL16            | 6.383053294        | 6.060945633        | 6.625586124        | 0.56464         | 2.035038        |
| C3AR1           | 7.819122616        | 7.550144742        | 8.047679266        | 0.497535        | 1.93555         |
| PTPN7           | 6.442389381        | 6.141385918        | 6.671142424        | 0.529757        | 1.808005        |
| MAP4K1          | 6.4303588          | 6.142728877        | 6.653082456        | 0.510354        | 1.674856        |
| LAT             | 5.945900983        | 5.644310695        | 6.172238756        | 0.527928        | 1.65717         |
| CTSW            | 6.470041101        | 6.19022139         | 6.680219458        | 0.489998        | 1.553445        |
| CD6             | 7.638147984        | 7.385813012        | 7.835034609        | 0.449222        | 1.541379        |
| MYO1F           | 6.988559194        | 6.730153476        | 7.19671882         | 0.466565        | 1.521292        |
| SP140           | 4.900231957        | 4.585762389        | 5.132966826        | 0.547204        | 1.46729         |
| SLAMF1          | 5.069247886        | 4.771623529        | 5.294866986        | 0.523243        | 1.387878        |
| AOAH            | 5.993415241        | 5.734043137        | 6.203420893        | 0.469378        | 1.320442        |
| PRKCQ           | 6.170280924        | 5.910334046        | 6.372172249        | 0.461838        | 1.316087        |
| ITGAL           | 5.694476106        | 5.425220677        | 5.893082775        | 0.467862        | 1.246492        |
| FAM65B          | 4.325567453        | 4.01714385         | 4.542195534        | 0.525052        | 1.192469        |
| SIRPG           | 5.298496362        | 5.032109982        | 5.495497129        | 0.463387        | 1.137734        |
| ZAP70           | 5.480504326        | 5.225018717        | 5.670443381        | 0.445425        | 1.087349        |
| TRAT1           | 4.074480728        | 3.779438859        | 4.289792185        | 0.510353        | 1.061241        |
| MFNG            | 6.575046411        | 6.351592157        | 6.745508772        | 0.393917        | 1.020252        |
| PPP1R16B        | 4.824646509        | 4.563967558        | 5.011176874        | 0.447209        | 0.964911        |
| ICOS            | 4.791651622        | 4.544464706        | 4.976512281        | 0.432048        | 0.894434        |
| CD7             | 5.330499902        | 5.109503922        | 5.498829346        | 0.389325        | 0.807967        |
| CD96            | 4.462033235        | 4.219178075        | 4.642878469        | 0.4237          | 0.801033        |
| CRTAM           | 3.881993805        | 3.664434046        | 4.042034769        | 0.377601        | 0.553504        |
| UBASH3A         | <b>4.739270403</b> | <b>4.550793226</b> | <b>4.878039075</b> | <b>0.327246</b> | <b>0.507528</b> |
| <b>HLA-DRB1</b> | 11.35432242        | 11.31654813        | 11.38883349        | 0.072285        | 0.059328        |
| NCF1C           | 5.852842281        | 5.819620677        | 5.881574641        | 0.061954        | 0.022465        |
| <b>HLA-DRB6</b> | 7.672151032        | 7.641781105        | 7.695711962        | 0.053931        | 0.022315        |
| NCF1            | 5.668487807        | 5.634323708        | 5.694335726        | 0.060012        | 0.020415        |

**Supplemental Table 3. iRDM 72-gene panel**

| <b>Immunity genes(17)</b> | <b>Invasion genes(2)</b> | <b>Prolif genes(19)</b> | <b>Her2 genes (3)</b>   |       |       |      |
|---------------------------|--------------------------|-------------------------|-------------------------|-------|-------|------|
| APOBEC3G                  | CTSL2                    | AURKA                   | HER2                    |       |       |      |
| CCL5                      | MMP11                    | BIRC5                   | FGFR4                   |       |       |      |
| CCR2                      | <b>ER genes (14)</b>     | CCNB1                   | GRB7                    |       |       |      |
| CD2                       | BAG1                     | CCNE1                   | <b>Basal genes (11)</b> |       |       |      |
| CD27                      | BCL2                     | CDC20                   | ACTR3B                  |       |       |      |
| CD3D                      | BLVRA                    | CDC6                    | CDH3                    |       |       |      |
| CD52                      | CD68                     | CENPF                   | EGFR                    |       |       |      |
| CORO1A                    | ER                       | CEP55                   | FOXC1                   |       |       |      |
| CXCL9                     | FOXA1                    | EXO1                    | KRT14                   |       |       |      |
| GZMA                      | GSTM1                    | KIF2C                   | KRT17                   |       |       |      |
| GZMK                      | MAPT                     | MELK                    | KRT5                    |       |       |      |
| HLA-DMA                   | MDM2                     | Ki67                    | MIA                     |       |       |      |
| IL2RG                     | MLPH                     | MYBL2                   | MYC                     |       |       |      |
| LCK                       | NAT1                     | NDC80                   | PHGDH                   |       |       |      |
| PRKCB                     | PGR                      | ORC6                    | SFRP1                   |       |       |      |
| PTPRC                     | SCUBE2                   | PTTG1                   | TYMS                    |       |       |      |
| SH2D1A                    | SLC39A6                  | RRM2                    | UBE2C                   |       |       |      |
| <b>Reference Genes(6)</b> | GAPDH                    | GUSB                    | MRPL19                  | PSMC4 | SF3A1 | TFRC |

**Supplemental Table 4. Composition of subtypes by PAM50 algorithm within iRDM Immuno group in Training and Test data**

| <b>Immuno Only</b> | <b>PAM50</b> | <b>Basal</b> | <b>HER2E</b> | <b>LumA</b> | <b>LumB</b> | <b>Normal</b> | <b>Mixed</b> | <b>Total</b> |
|--------------------|--------------|--------------|--------------|-------------|-------------|---------------|--------------|--------------|
| <b>AFFY1951</b>    | <b>No.</b>   | 48           | 48           | 51          | 91          | 10            | 94           | 342          |
|                    | <b>%</b>     | 14%          | 14%          | 15%         | 27%         | 3%            | 27%          | 100%         |
| <b>METABRIC</b>    | <b>No.</b>   | 40           | 33           | 31          | 85          | 26            | 108          | 323          |
|                    | <b>%</b>     | 12%          | 10%          | 10%         | 26%         | 8%            | 33%          | 100%         |
| <b>TCGA</b>        | <b>No.</b>   | 19           | 22           | 35          | 55          | 3             | 37           | 171          |
|                    | <b>%</b>     | 11%          | 13%          | 20%         | 32%         | 2%            | 22%          | 100%         |
| <b>TARGETSEQ</b>   | <b>No.</b>   | 11           | 24           | 7           | 18          | 2             | 18           | 80           |
|                    | <b>%</b>     | 14%          | 30%          | 9%          | 22%         | 2%            | 22%          | 100%         |



**Supplemental Table 5. Tils on H&E slides and gene expression Immunity Scores of 91 Triple Negative Breast Cancer**

| Sample_Name | event_DMFS | DMFS_YEARS | TILs1 percentage | TILs2 percentage | TILs3 percentage | TILs4 percentage | TILs5 percentage | TILsAverage | TIL50_Groups | Immuno_Score | Immuno_Groups | TIL50_ImmunoScore_3Groups | Subtype_by_iRDM | Subtype_by_PAM50 |
|-------------|------------|------------|------------------|------------------|------------------|------------------|------------------|-------------|--------------|--------------|---------------|---------------------------|-----------------|------------------|
| SH_TS_BC111 | 0          | 6.67       | 20               | 5                | 5                | 5                | 5                | 8           | low          | 36           | istrong       | TIL50_low_istrong         | Basal           | Basal            |
| SH_TS_BC113 | 0          | 1.92       | 30               | 5                | 10               | 5                | 5                | 11          | low          | 34           | istrong       | TIL50_low_istrong         | Basal           | Basal            |
| SH_TS_BC119 | 0          | 6.75       | 50               | 40               | 65               | 90               | 40               | 57          | high         | 45           | istrong       | TIL50_high_istrong        | Her2            | Her2             |
| SH_TS_BC133 | 0          | 3.92       | 80               | 50               | 60               | 60               | 30               | 56          | high         | 21           | iweak         | TIL50_high_iweak          | Basal           | Basal            |
| SH_TS_BC139 | 1          | 5.75       | 20               | 5                | 30               | 5                | 5                | 13          | low          | 31           | istrong       | TIL50_low_istrong         | Basal           | Basal            |
| SH_TS_BC141 | 0          | 8.17       | 50               | 25               | 20               | 20               | 15               | 26          | low          | 36           | istrong       | TIL50_low_istrong         | Basal           | Basal            |
| SH_TS_BC146 | 0          | 3.42       | 10               | 5                | 5                | 15               | 5                | 8           | low          | 27           | iweak         | TIL50_low_iweak           | Basal           | Basal            |
| SH_TS_BC151 | 0          | 2.17       | 80               | 50               | 60               | 90               | 90               | 74          | high         | 53           | istrong       | TIL50_high_istrong        | Basal           | Basal            |
| SH_TS_BC152 | 1          | 0.75       | 5                | 15               | 5                | 5                | 5                | 7           | low          | 1            | iweak         | TIL50_low_iweak           | Basal           | Basal            |
| SH_TS_BC153 | 0          | 9.25       | 80               | 65               | 50               | 45               | 70               | 62          | high         | 54           | istrong       | TIL50_high_istrong        | Immuno          | Her2             |
| SH_TS_BC154 | 0          | 0.25       | 1                | 5                | 5                | 5                | 1                | 3.4         | low          | 26           | iweak         | TIL50_low_iweak           | Basal           | Basal            |
| SH_TS_BC155 | 0          | 9.00       | 30               | 5                | 50               | 40               | 20               | 29          | low          | 39           | istrong       | TIL50_low_istrong         | Basal           | Basal            |
| SH_TS_BC160 | 0          | 8.42       | 5                | 5                | 5                | 1                | 10               | 5.2         | low          | 38           | istrong       | TIL50_low_istrong         | Basal           | Basal            |
| SH_TS_BC163 | 0          | 8.00       | 10               | 55               | 15               | 40               | 25               | 29          | low          | 33           | istrong       | TIL50_low_istrong         | Her2            | Her2             |
| SH_TS_BC166 | 0          | 7.75       | 50               | 10               | 25               | 10               | 20               | 23          | low          | 47           | istrong       | TIL50_low_istrong         | Basal           | Basal            |
| SH_TS_BC169 | 0          | 7.50       | 20               | 10               | 5                | 20               | 25               | 16          | low          | 38           | istrong       | TIL50_low_istrong         | Her2            | Her2             |
| SH_TS_BC170 | 0          | 6.83       | 55               | 60               | 30               | 45               | 60               | 50          | high         | 54           | istrong       | TIL50_high_istrong        | Immuno          | Her2             |
| SH_TS_BC171 | 0          | 7.67       | 60               | 70               | 90               | 80               | 80               | 76          | high         | 80           | istrong       | TIL50_high_istrong        | Immuno          | Basal            |
| SH_TS_BC172 | 0          | ###        | 70               | 30               | 30               | 10               | 50               | 38          | low          | 20           | iweak         | TIL50_low_iweak           | Basal           | Basal            |
| SH_TS_BC173 | 0          | 7.50       | 25               | 50               | 15               | 15               | 5                | 22          | low          | 17           | iweak         | TIL50_low_iweak           | Basal           | Basal            |
| SH_TS_BC175 | 0          | 7.42       | 30               | 25               | 30               | 40               | 30               | 31          | low          | 50           | istrong       | TIL50_low_istrong         | Immuno          | Her2             |
| SH_TS_BC176 | 0          | ###        | 50               | 30               | 50               | 30               | 45               | 41          | low          | 33           | istrong       | TIL50_low_istrong         | Her2            | Her2             |
| SH_TS_BC177 | 0          | 7.33       | 70               | 50               | 75               | 45               | 50               | 58          | high         | 47           | istrong       | TIL50_high_istrong        | Her2            | Her2             |
| SH_TS_BC180 | 0          | 0.50       | 90               | 90               | 80               | 80               | 60               | 80          | high         | 44           | istrong       | TIL50_high_istrong        | Basal           | Basal            |
| SH_TS_BC181 | 0          | 2.33       | 70               | 10               | 10               | 5                | 5                | 20          | low          | 26           | iweak         | TIL50_low_iweak           | Her2            | Her2             |
| SH_TS_BC182 | 1          | 1.67       | 50               | 35               | 35               | 50               | 45               | 43          | low          | 57           | istrong       | TIL50_low_istrong         | Immuno          | Her2             |
| SH_TS_BC183 | 0          | 1.25       | 5                | 5                | 1                | 15               | 5                | 6.2         | low          | 35           | istrong       | TIL50_low_istrong         | Basal           | Basal            |
| SH_TS_BC184 | 0          | 4.58       | 50               | 20               | 70               | 90               | 90               | 64          | high         | 41           | istrong       | TIL50_high_istrong        | Basal           | Basal            |
| SH_TS_BC185 | 0          | 2.25       | 10               | 5                | 1                | 5                | 10               | 6.2         | low          | 23           | iweak         | TIL50_low_iweak           | Basal           | Basal            |
| SH_TS_BC188 | 1          | 1.50       | 5                | 15               | 40               | 35               | 10               | 21          | low          | 49           | istrong       | TIL50_low_istrong         | Basal           | Basal            |
| SH_TS_BC193 | 0          | 7.00       | 50               | 40               | 10               | 10               | 5                | 23          | low          | 44           | istrong       | TIL50_low_istrong         | Immuno          | Basal            |
| SH_TS_BC196 | 0          | 0.08       | 15               | 10               | 10               | 5                | 40               | 16          | low          | 37           | istrong       | TIL50_low_istrong         | Her2            | Basal            |
| SH_TS_BC200 | 0          | 1.58       | 20               | 20               | 20               | 5                | 10               | 15          | low          | 40           | istrong       | TIL50_low_istrong         | Basal           | Basal            |
| SH_TS_BC202 | 0          | 2.08       | 60               | 20               | 15               | 25               | 5                | 25          | low          | 52           | istrong       | TIL50_low_istrong         | Immuno          | Basal            |

|                 |   |      |    |    |    |    |    |     |      |    |         |                    |        |       |
|-----------------|---|------|----|----|----|----|----|-----|------|----|---------|--------------------|--------|-------|
| SH_TS_BC203     | 0 | 6.92 | 5  | 5  | 5  | 5  | 5  | 5   | low  | 40 | istrong | TIL50_low_istrong  | Basal  | Basal |
| SH_TS_BC204     | 0 | 6.67 | 10 | 50 | 50 | 20 | 15 | 29  | low  | 60 | istrong | TIL50_low_istrong  | Immuno | Her2  |
| SH_TS_BC207     | 0 | 5.50 | 70 | 80 | 60 | 90 | 60 | 72  | high | 35 | istrong | TIL50_high_istrong | Basal  | Basal |
| SH_TS_BC211     | 1 | 0.33 | 5  | 5  | 5  | 10 | 5  | 6   | low  | 53 | istrong | TIL50_low_istrong  | Immuno | Her2  |
| SH_TS_BC212     | 0 | 6.42 | 5  | 5  | 10 | 5  | 5  | 6   | low  | 34 | istrong | TIL50_low_istrong  | Her2   | Her2  |
| SH_TS_BC213     | 0 | 7.75 | 5  | 5  | 5  | 10 | 5  | 6   | low  | 31 | istrong | TIL50_low_istrong  | Basal  | Basal |
| SH_TS_BC214     | 0 | 0.83 | 70 | 60 | 70 | 60 | 40 | 60  | high | 28 | iweak   | TIL50_high_iweak   | Basal  | Basal |
| SH_TS_BC220     | 1 | 0.83 | 5  | 5  | 5  | 1  | 10 | 5.2 | low  | 19 | iweak   | TIL50_low_iweak    | Basal  | Basal |
| SH_TS_BC222     | 1 | 4.08 | 40 | 45 | 30 | 35 | 30 | 36  | low  | 22 | iweak   | TIL50_low_iweak    | Basal  | Basal |
| SH_TS_BC226     | 0 | 5.17 | 5  | 5  | 5  | 1  | 1  | 3.4 | low  | 39 | istrong | TIL50_low_istrong  | Basal  | Basal |
| SH_TS_BC232     | 1 | 1.00 | 10 | 5  | 5  | 5  | 5  | 6   | low  | 28 | iweak   | TIL50_low_iweak    | Her2   | Basal |
| SH_TS_BC236     | 1 | 2.83 | 35 | 5  | 10 | 15 | 50 | 23  | low  | 41 | istrong | TIL50_low_istrong  | Basal  | Basal |
| SH_TS_BC237     | 1 | 2.17 | 40 | 60 | 20 | 20 | 90 | 46  | low  | 28 | iweak   | TIL50_low_iweak    | Basal  | Basal |
| SH_TS_BC239     | 0 | 1.42 | 5  | 5  | 5  | 5  | 5  | 5   | low  | 31 | istrong | TIL50_low_istrong  | Basal  | Basal |
| SH_TS_BC240     | 0 | 2.67 | 90 | 80 | 70 | 75 | 70 | 77  | high | 71 | istrong | TIL50_high_istrong | Immuno | Basal |
| SH_TS_BC243     | 0 | 4.00 | 30 | 20 | 50 | 60 | 50 | 42  | low  | 37 | istrong | TIL50_low_istrong  | Basal  | Basal |
| SH_TS_BC246     | 0 | 4.92 | 60 | 10 | 15 | 10 | 35 | 26  | low  | 21 | iweak   | TIL50_low_iweak    | Her2   | Her2  |
| SH_TS_BC247     | 1 | 1.33 | 20 | 5  | 30 | 5  | 5  | 13  | low  | 34 | istrong | TIL50_low_istrong  | Basal  | Basal |
| SH_TS_BC249     | 0 | 5.25 | 80 | 25 | 75 | 85 | 60 | 65  | high | 52 | istrong | TIL50_high_istrong | Basal  | Basal |
| SH_TS_BC251     | 0 | 2.75 | 5  | 15 | 10 | 20 | 5  | 11  | low  | 40 | istrong | TIL50_low_istrong  | Basal  | Basal |
| SH_TS_BC252     | 0 | 5.25 | 40 | 60 | 50 | 40 | 60 | 50  | high | 56 | istrong | TIL50_high_istrong | LumA   | Basal |
| SH_TS_BC253     | 0 | 5.25 | 10 | 5  | 1  | 10 | 5  | 6.2 | low  | 31 | istrong | TIL50_low_istrong  | Basal  | Basal |
| SH_TS_BC255     | 0 | 5.08 | 10 | 40 | 40 | 35 | 20 | 29  | low  | 72 | istrong | TIL50_low_istrong  | Immuno | Her2  |
| SH_TS_BC257     | 0 | 5.50 | 80 | 70 | 80 | 80 | 50 | 72  | high | 41 | istrong | TIL50_high_istrong | Basal  | Basal |
| SH_TS_BC258     | 1 | 1.67 | 20 | 20 | 25 | 55 | 20 | 28  | low  | 41 | istrong | TIL50_low_istrong  | Basal  | Basal |
| SH_TS_BC260     | 0 | 5.50 | 10 | 5  | 10 | 35 | 40 | 20  | low  | 32 | istrong | TIL50_low_istrong  | Basal  | Basal |
| SH_TS_BC262     | 0 | 5.58 | 40 | 30 | 20 | 20 | 40 | 30  | low  | 11 | iweak   | TIL50_low_iweak    | Basal  | Basal |
| SH_TS_BC264     | 1 | 1.42 | 15 | 15 | 10 | 15 | 5  | 12  | low  | 32 | istrong | TIL50_low_istrong  | Basal  | Basal |
| SH_TS_BC265     | 0 | 5.33 | 65 | 80 | 25 | 30 | 50 | 50  | high | 42 | istrong | TIL50_high_istrong | Basal  | Basal |
| SH_TS_BC266     | 0 | 3.58 | 20 | 15 | 5  | 10 | 25 | 15  | low  | 43 | istrong | TIL50_low_istrong  | Basal  | Basal |
| SH_TS_BC271     | 0 | 4.33 | 10 | 20 | 30 | 20 | 15 | 19  | low  | 37 | istrong | TIL50_low_istrong  | LumA   | Basal |
| SH_TS_BC272     | 0 | 4.42 | 80 | 90 | 70 | 80 | 80 | 80  | high | 55 | istrong | TIL50_high_istrong | Basal  | Basal |
| SH_TS_BC273     | 0 | 4.58 | 10 | 5  | 5  | 5  | 5  | 6   | low  | 36 | istrong | TIL50_low_istrong  | Basal  | Her2  |
| SH_TS_BC281     | 0 | 4.00 | 60 | 30 | 50 | 40 | 25 | 41  | low  | 38 | istrong | TIL50_low_istrong  | Her2   | Her2  |
| SH_TS_BC283     | 0 | ###  | 40 | 30 | 30 | 20 | 35 | 31  | low  | 43 | istrong | TIL50_low_istrong  | Her2   | Her2  |
| SH_TS_BC284     | 0 | 5.00 | 50 | 40 | 35 | 10 | 45 | 36  | low  | 47 | istrong | TIL50_low_istrong  | LumA   | Her2  |
| SH_TS_BC285     | 0 | 5.92 | 15 | 10 | 2  | 20 | 15 | 12  | low  | 27 | iweak   | TIL50_low_iweak    | Basal  | Basal |
| SH_TS_BC286     | 0 | 6.00 | 5  | 2  | 10 | 5  | 15 | 7.4 | low  | 45 | istrong | TIL50_low_istrong  | Basal  | Basal |
| SH_TS_BC287     | 1 | 0.04 | 5  | 1  | 1  | 2  | 2  | 2.2 | low  | 27 | iweak   | TIL50_low_iweak    | Basal  | Basal |
| SH_TS_BC290     | 0 | 8.92 | 10 | 15 | 80 | 10 | 20 | 27  | low  | 47 | istrong | TIL50_low_istrong  | Basal  | Basal |
| SH_TS_BC296     | 0 | 5.83 | 50 | 80 | 60 | 50 | 60 | 60  | high | 44 | istrong | TIL50_high_istrong | Basal  | Basal |
| SH_TS_BC1805004 | 1 | 2.67 | 10 | 15 | 5  | 5  | 10 | 9   | low  | 34 | istrong | TIL50_low_istrong  | Basal  | Basal |
| SH_TS_BC1805005 | 0 | 7.83 | 25 | 25 | 5  | 5  | 10 | 14  | low  | 34 | istrong | TIL50_low_istrong  | Her2   | Her2  |
| SH_TS_BC1805006 | 1 | 1.92 | 10 | 5  | 5  | 15 | 20 | 11  | low  | 39 | istrong | TIL50_low_istrong  | Basal  | Basal |
| SH_TS_BC1805008 | 1 | 0.92 | 10 | 25 | 15 | 10 | 5  | 13  | low  | 46 | istrong | TIL50_low_istrong  | Basal  | Basal |
| SH_TS_BC1805009 | 0 | 7.67 | 50 | 30 | 35 | 60 | 50 | 45  | low  | 69 | istrong | TIL50_low_istrong  | LumA   | Basal |
| SH_TS_BC1805010 | 0 | 4.83 | 80 | 60 | 90 | 50 | 80 | 72  | high | 70 | istrong | TIL50_high_istrong | Basal  | Basal |

|                 |   |      |    |    |    |    |    |    |      |    |         |                    |        |       |
|-----------------|---|------|----|----|----|----|----|----|------|----|---------|--------------------|--------|-------|
| SH_TS_BC1805011 | 0 | 4.92 | 80 | 60 | 70 | 40 | 50 | 60 | high | 65 | istrong | TIL50_high_istrong | Basal  | Basal |
| SH_TS_BC1805013 | 0 | 5.08 | 20 | 10 | 10 | 10 | 10 | 12 | low  | 42 | istrong | TIL50_low_istrong  | Basal  | Basal |
| SH_TS_BC1805015 | 1 | 1.42 | 30 | 5  | 5  | 5  | 20 | 13 | low  | 36 | istrong | TIL50_low_istrong  | Her2   | Her2  |
| SH_TS_BC1805016 | 0 | 4.92 | 25 | 50 | 70 | 55 | 40 | 48 | low  | 44 | istrong | TIL50_low_istrong  | Basal  | Basal |
| SH_TS_BC1805017 | 0 | 5.92 | 10 | 15 | 25 | 20 | 15 | 17 | low  | 54 | istrong | TIL50_low_istrong  | Basal  | Basal |
| SH_TS_BC1805018 | 1 | 0.17 | 30 | 10 | 5  | 10 | 5  | 12 | low  | 27 | iweak   | TIL50_low_iweak    | Basal  | Her2  |
| SH_TS_BC1805019 | 1 | 0.58 | 25 | 5  | 10 | 15 | 10 | 13 | low  | 53 | istrong | TIL50_low_istrong  | Basal  | Basal |
| SH_TS_BC307     | 0 | 5.58 | 50 | 50 | 15 | 25 | 70 | 42 | low  | 45 | istrong | TIL50_low_istrong  | Her2   | Her2  |
| SH_TS_BC310     | 0 | 2.08 | 80 | 90 | 15 | 30 | 20 | 47 | low  | 64 | istrong | TIL50_low_istrong  | Immuno | Her2  |
| SH_TS_BC376     | 1 | 1.58 | 35 | 30 | 20 | 15 | 10 | 22 | low  | 18 | iweak   | TIL50_low_iweak    | Her2   | Her2  |

---



**Supplemental Table 6. DMFS time and event of 303 patients in TAREGETSEQ dataset.**

| TARGETSEQ_Sample | DMFS_TIME(YEARS) | DMFS_EVENT | ER_status | iRDM_subtypes | Proliferation_Groups | Immunity_Groups | iRDM_score | iRDM_risk_group |
|------------------|------------------|------------|-----------|---------------|----------------------|-----------------|------------|-----------------|
| SH_TS_BC111      | 6.67             | 0          | ER+       | Basal         | high                 | iweak           | 57         | high            |
| SH_TS_BC112      | 6.08             | 0          | ER+       | LumA          | low                  | iweak           | 16         | low             |
| SH_TS_BC113      | 1.92             | 0          | ER-       | Basal         | high                 | iweak           | 57         | high            |
| SH_TS_BC119      | 6.75             | 0          | ER-       | Her2          | high                 | istrong         | 48         | med             |
| SH_TS_BC133      | 3.92             | 0          | ER+       | Basal         | high                 | iweak           | 93         | high            |
| SH_TS_BC134      | 11.00            | 0          | ER+       | LumA          | low                  | iweak           | 40         | med             |
| SH_TS_BC139      | 5.75             | 1          | ER+       | Basal         | high                 | iweak           | 75         | high            |
| SH_TS_BC141      | 8.17             | 0          | ER+       | Basal         | low                  | iweak           | 63         | high            |
| SH_TS_BC146      | 3.42             | 0          | ER+       | Basal         | high                 | iweak           | 85         | high            |
| SH_TS_BC147      | 9.75             | 0          | ER+       | LumB          | high                 | iweak           | 57         | high            |
| SH_TS_BC150      | 9.08             | 0          | ER+       | LumA          | low                  | istrong         | 1          | low             |
| SH_TS_BC151      | 2.17             | 0          | ER-       | Basal         | high                 | istrong         | 38         | med             |
| SH_TS_BC152      | 0.75             | 1          | ER+       | Basal         | high                 | iweak           | 81         | high            |
| SH_TS_BC153      | 9.25             | 0          | ER+       | Immuno        | high                 | istrong         | 61         | high            |
| SH_TS_BC154      | 0.25             | 0          | ER-       | Basal         | high                 | iweak           | 66         | high            |
| SH_TS_BC155      | 9.00             | 0          | ER+       | Basal         | high                 | iweak           | 61         | high            |
| SH_TS_BC160      | 8.42             | 0          | ER-       | Basal         | high                 | iweak           | 59         | high            |
| SH_TS_BC161      | 3.17             | 0          | ER-       | Her2          | high                 | iweak           | 59         | high            |
| SH_TS_BC163      | 8.00             | 0          | ER-       | Her2          | high                 | iweak           | 60         | high            |
| SH_TS_BC165      | 7.75             | 0          | ER+       | Immuno        | low                  | istrong         | 26         | low             |
| SH_TS_BC166      | 7.75             | 0          | ER-       | Basal         | high                 | istrong         | 50         | high            |
| SH_TS_BC169      | 7.50             | 0          | ER+       | Her2          | high                 | iweak           | 63         | high            |
| SH_TS_BC170      | 6.83             | 0          | ER+       | Immuno        | low                  | istrong         | 41         | med             |
| SH_TS_BC171      | 7.67             | 0          | ER+       | Immuno        | low                  | istrong         | 33         | med             |
| SH_TS_BC172      | 13.17            | 0          | ER-       | Basal         | high                 | iweak           | 60         | high            |
| SH_TS_BC173      | 7.50             | 0          | ER-       | Basal         | high                 | iweak           | 61         | high            |
| SH_TS_BC175      | 7.42             | 0          | ER-       | Immuno        | low                  | istrong         | 49         | med             |
| SH_TS_BC176      | 10.33            | 0          | ER+       | Her2          | high                 | iweak           | 68         | high            |
| SH_TS_BC177      | 7.33             | 0          | ER-       | Her2          | high                 | istrong         | 47         | med             |
| SH_TS_BC178      | 7.00             | 0          | ER+       | LumA          | low                  | istrong         | 4          | low             |
| SH_TS_BC180      | 0.50             | 0          | ER+       | Basal         | high                 | istrong         | 68         | high            |
| SH_TS_BC181      | 2.33             | 0          | ER-       | Her2          | high                 | iweak           | 63         | high            |
| SH_TS_BC182      | 1.67             | 1          | ER-       | Immuno        | low                  | istrong         | 40         | med             |
| SH_TS_BC183      | 1.25             | 0          | ER-       | Basal         | high                 | iweak           | 63         | high            |
| SH_TS_BC184      | 4.58             | 0          | ER+       | Basal         | high                 | iweak           | 76         | high            |
| SH_TS_BC185      | 2.25             | 0          | ER-       | Basal         | high                 | iweak           | 64         | high            |
| SH_TS_BC188      | 1.50             | 1          | ER+       | Basal         | high                 | istrong         | 78         | high            |
| SH_TS_BC193      | 7.00             | 0          | ER-       | Immuno        | high                 | istrong         | 37         | med             |
| SH_TS_BC196      | 0.08             | 0          | ER+       | Her2          | high                 | iweak           | 82         | high            |

|             |       |   |     |        |      |         |    |      |
|-------------|-------|---|-----|--------|------|---------|----|------|
| SH_TS_BC198 | 6.75  | 0 | ER+ | LumB   | high | iweak   | 57 | high |
| SH_TS_BC199 | 7.00  | 0 | ER+ | LumA   | low  | istrong | 24 | low  |
| SH_TS_BC200 | 1.58  | 0 | ER+ | Basal  | high | iweak   | 66 | high |
| SH_TS_BC202 | 2.08  | 0 | ER+ | Immuno | low  | istrong | 45 | med  |
| SH_TS_BC203 | 6.92  | 0 | ER+ | Basal  | high | iweak   | 53 | high |
| SH_TS_BC204 | 6.67  | 0 | ER- | Immuno | high | istrong | 35 | med  |
| SH_TS_BC207 | 5.50  | 0 | ER+ | Basal  | high | iweak   | 88 | high |
| SH_TS_BC209 | 0.42  | 1 | ER+ | Basal  | high | istrong | 75 | high |
| SH_TS_BC210 | 2.25  | 0 | ER+ | LumA   | low  | iweak   | 15 | low  |
| SH_TS_BC211 | 0.33  | 1 | ER- | Immuno | high | istrong | 36 | med  |
| SH_TS_BC212 | 6.42  | 0 | ER- | Her2   | high | iweak   | 59 | high |
| SH_TS_BC213 | 7.75  | 0 | ER+ | Basal  | high | iweak   | 80 | high |
| SH_TS_BC214 | 0.83  | 0 | ER- | Basal  | high | iweak   | 59 | high |
| SH_TS_BC219 | 5.08  | 0 | ER+ | LumA   | low  | istrong | 32 | low  |
| SH_TS_BC220 | 0.83  | 1 | ER- | Basal  | high | iweak   | 65 | high |
| SH_TS_BC222 | 4.08  | 1 | ER- | Basal  | high | iweak   | 64 | high |
| SH_TS_BC226 | 5.17  | 0 | ER+ | Basal  | low  | iweak   | 63 | high |
| SH_TS_BC232 | 1.00  | 1 | ER- | Her2   | high | iweak   | 62 | high |
| SH_TS_BC233 | 1.92  | 0 | ER+ | LumA   | low  | istrong | 17 | low  |
| SH_TS_BC235 | 2.08  | 0 | ER+ | LumA   | low  | istrong | 20 | low  |
| SH_TS_BC236 | 2.83  | 1 | ER+ | Basal  | high | iweak   | 67 | high |
| SH_TS_BC237 | 2.17  | 1 | ER+ | Basal  | high | iweak   | 65 | high |
| SH_TS_BC239 | 1.42  | 0 | ER- | Basal  | high | iweak   | 63 | high |
| SH_TS_BC240 | 2.67  | 0 | ER- | Immuno | low  | istrong | 58 | high |
| SH_TS_BC243 | 4.00  | 0 | ER- | Basal  | high | iweak   | 60 | high |
| SH_TS_BC246 | 4.92  | 0 | ER+ | Her2   | high | iweak   | 87 | high |
| SH_TS_BC247 | 1.33  | 1 | ER- | Basal  | high | iweak   | 59 | high |
| SH_TS_BC249 | 5.25  | 0 | ER+ | Basal  | low  | istrong | 55 | high |
| SH_TS_BC251 | 2.75  | 0 | ER- | Basal  | high | iweak   | 49 | med  |
| SH_TS_BC252 | 5.25  | 0 | ER- | LumA   | low  | istrong | 50 | high |
| SH_TS_BC253 | 5.25  | 0 | ER+ | Basal  | high | iweak   | 70 | high |
| SH_TS_BC255 | 5.08  | 0 | ER- | Immuno | low  | istrong | 45 | med  |
| SH_TS_BC257 | 5.50  | 0 | ER+ | Basal  | high | iweak   | 74 | high |
| SH_TS_BC258 | 1.67  | 1 | ER+ | Basal  | low  | iweak   | 70 | high |
| SH_TS_BC260 | 5.50  | 0 | ER- | Basal  | high | iweak   | 57 | high |
| SH_TS_BC262 | 5.58  | 0 | ER- | Basal  | high | iweak   | 61 | high |
| SH_TS_BC264 | 1.42  | 1 | ER- | Basal  | high | iweak   | 55 | high |
| SH_TS_BC265 | 5.33  | 0 | ER+ | Basal  | low  | istrong | 63 | high |
| SH_TS_BC266 | 3.58  | 0 | ER- | Basal  | high | istrong | 49 | med  |
| SH_TS_BC271 | 4.33  | 0 | ER+ | LumA   | low  | iweak   | 52 | high |
| SH_TS_BC272 | 4.42  | 0 | ER- | Basal  | high | istrong | 38 | med  |
| SH_TS_BC273 | 4.58  | 0 | ER+ | Basal  | high | iweak   | 73 | high |
| SH_TS_BC281 | 4.00  | 0 | ER- | Her2   | high | iweak   | 58 | high |
| SH_TS_BC283 | 17.00 | 0 | ER+ | Her2   | high | istrong | 71 | high |
| SH_TS_BC284 | 5.00  | 0 | ER+ | LumA   | low  | istrong | 51 | high |
| SH_TS_BC285 | 5.92  | 0 | ER+ | Basal  | high | iweak   | 58 | high |
| SH_TS_BC286 | 6.00  | 0 | ER+ | Basal  | high | istrong | 69 | high |

|              |      |   |     |        |      |         |    |      |
|--------------|------|---|-----|--------|------|---------|----|------|
| SH_TS_BC287  | 0.04 | 1 | ER+ | Basal  | high | iweak   | 78 | high |
| SH_TS_BC289  | 3.42 | 1 | ER+ | LumA   | low  | istrong | 23 | low  |
| SH_TS_BC290  | 8.92 | 0 | ER+ | Basal  | high | istrong | 80 | high |
| SH_TS_BC291  | 6.00 | 0 | ER+ | LumA   | low  | istrong | 45 | med  |
| SH_TS_BC296  | 5.83 | 0 | ER- | Basal  | high | istrong | 48 | med  |
| UNC_TS_BC01  | 5.17 | 0 | ER+ | Immuno | low  | istrong | 31 | low  |
| UNC_TS_BC02  | 5.17 | 0 | ER+ | LumA   | low  | iweak   | 22 | low  |
| UNC_TS_BC03  | 5.08 | 0 | ER+ | LumA   | low  | iweak   | 29 | low  |
| UNC_TS_BC04  | 5.58 | 0 | ER+ | LumB   | high | iweak   | 47 | med  |
| UNC_TS_BC06  | 1.08 | 0 | ER+ | Immuno | high | istrong | 42 | med  |
| UNC_TS_BC07  | 4.33 | 0 | ER+ | Immuno | high | istrong | 63 | high |
| UNC_TS_BC10  | 4.92 | 0 | ER+ | Basal  | high | iweak   | 83 | high |
| UNC_TS_BC105 | 2.75 | 0 | ER- | LumA   | low  | istrong | 49 | med  |
| UNC_TS_BC106 | 6.00 | 0 | ER- | Immuno | low  | istrong | 53 | high |
| UNC_TS_BC109 | 5.83 | 0 | ER+ | LumA   | low  | istrong | 12 | low  |
| UNC_TS_BC11  | 5.50 | 0 | ER- | Immuno | high | istrong | 39 | med  |
| UNC_TS_BC110 | 5.75 | 0 | ER+ | Basal  | low  | iweak   | 58 | high |
| UNC_TS_BC111 | 5.58 | 0 | ER+ | LumA   | low  | istrong | 19 | low  |
| UNC_TS_BC113 | 5.75 | 0 | ER+ | Immuno | low  | istrong | 21 | low  |
| UNC_TS_BC115 | 5.92 | 0 | ER+ | Immuno | high | istrong | 48 | med  |
| UNC_TS_BC118 | 5.25 | 0 | ER+ | LumB   | high | iweak   | 54 | high |
| UNC_TS_BC119 | 4.33 | 0 | ER+ | LumB   | high | istrong | 46 | med  |
| UNC_TS_BC120 | 1.75 | 0 | ER+ | LumA   | low  | iweak   | 17 | low  |
| UNC_TS_BC121 | 3.92 | 0 | ER+ | LumB   | high | istrong | 40 | med  |
| UNC_TS_BC122 | 5.58 | 0 | ER+ | Immuno | high | istrong | 51 | high |
| UNC_TS_BC123 | 5.83 | 0 | ER+ | LumA   | low  | iweak   | 26 | low  |
| UNC_TS_BC124 | 6.08 | 0 | ER+ | LumB   | high | iweak   | 42 | med  |
| UNC_TS_BC128 | 6.08 | 0 | ER+ | Immuno | high | istrong | 42 | med  |
| UNC_TS_BC129 | 6.42 | 0 | ER+ | LumA   | low  | iweak   | 28 | low  |
| UNC_TS_BC130 | 5.08 | 0 | ER+ | Immuno | low  | istrong | 34 | med  |
| UNC_TS_BC131 | 3.08 | 0 | ER+ | LumB   | low  | istrong | 30 | low  |
| UNC_TS_BC132 | 6.50 | 0 | ER+ | LumB   | high | istrong | 52 | high |
| UNC_TS_BC133 | 0.50 | 1 | ER- | Basal  | high | istrong | 50 | high |
| UNC_TS_BC134 | 6.25 | 0 | ER+ | LumB   | high | istrong | 14 | low  |
| UNC_TS_BC135 | 5.42 | 0 | ER+ | LumA   | low  | istrong | 17 | low  |
| UNC_TS_BC136 | 6.67 | 0 | ER+ | LumA   | low  | istrong | 14 | low  |
| UNC_TS_BC137 | 5.67 | 0 | ER+ | LumA   | low  | iweak   | 59 | high |
| UNC_TS_BC138 | 5.42 | 0 | ER+ | LumA   | low  | iweak   | 8  | low  |
| UNC_TS_BC139 | 6.33 | 0 | ER+ | Immuno | low  | istrong | 26 | low  |
| UNC_TS_BC140 | 5.92 | 0 | ER- | Basal  | high | istrong | 47 | med  |
| UNC_TS_BC141 | 0.92 | 0 | ER+ | LumA   | low  | iweak   | 14 | low  |
| UNC_TS_BC142 | 5.25 | 0 | ER+ | LumA   | low  | istrong | 22 | low  |
| UNC_TS_BC143 | 4.17 | 0 | ER+ | Her2   | high | istrong | 67 | high |
| UNC_TS_BC144 | 6.08 | 0 | ER- | Her2   | high | istrong | 51 | high |
| UNC_TS_BC145 | 5.58 | 0 | ER+ | LumA   | low  | istrong | 3  | low  |
| UNC_TS_BC146 | 4.75 | 0 | ER+ | LumA   | low  | iweak   | 38 | med  |
| UNC_TS_BC148 | 1.75 | 0 | ER- | Basal  | high | iweak   | 58 | high |

|              |      |   |     |        |      |         |    |      |
|--------------|------|---|-----|--------|------|---------|----|------|
| UNC_TS_BC149 | 6.50 | 0 | ER+ | LumA   | low  | iweak   | 29 | low  |
| UNC_TS_BC150 | 4.83 | 0 | ER+ | LumA   | low  | istrong | 5  | low  |
| UNC_TS_BC151 | 5.33 | 0 | ER+ | Her2   | high | istrong | 75 | high |
| UNC_TS_BC152 | 0.00 | 1 | ER- | Immuno | low  | istrong | 49 | med  |
| UNC_TS_BC153 | 2.00 | 0 | ER+ | Immuno | low  | istrong | 18 | low  |
| UNC_TS_BC154 | 6.08 | 0 | ER+ | LumA   | low  | istrong | 17 | low  |
| UNC_TS_BC155 | 5.58 | 0 | ER+ | LumA   | low  | iweak   | 26 | low  |
| UNC_TS_BC156 | 5.08 | 0 | ER- | Immuno | high | istrong | 37 | med  |
| UNC_TS_BC157 | 6.83 | 0 | ER+ | LumA   | low  | istrong | 23 | low  |
| UNC_TS_BC158 | 4.83 | 1 | ER- | Basal  | high | iweak   | 61 | high |
| UNC_TS_BC159 | 1.17 | 0 | ER+ | LumA   | low  | istrong | 13 | low  |
| UNC_TS_BC16  | 0.50 | 0 | ER+ | LumB   | high | istrong | 45 | med  |
| UNC_TS_BC160 | 5.92 | 0 | ER+ | LumB   | high | iweak   | 29 | low  |
| UNC_TS_BC161 | 6.25 | 0 | ER+ | LumB   | high | iweak   | 50 | high |
| UNC_TS_BC162 | 5.92 | 0 | ER+ | LumA   | low  | istrong | 4  | low  |
| UNC_TS_BC163 | 6.75 | 0 | ER+ | LumB   | high | iweak   | 47 | med  |
| UNC_TS_BC164 | 5.58 | 0 | ER+ | LumB   | high | iweak   | 42 | med  |
| UNC_TS_BC165 | 6.00 | 0 | ER+ | LumB   | low  | iweak   | 32 | low  |
| UNC_TS_BC166 | 6.67 | 0 | ER+ | Her2   | high | iweak   | 90 | high |
| UNC_TS_BC167 | 5.67 | 0 | ER+ | Immuno | low  | istrong | 46 | med  |
| UNC_TS_BC168 | 6.42 | 0 | ER+ | LumB   | high | istrong | 54 | high |
| UNC_TS_BC169 | 6.58 | 0 | ER- | Immuno | low  | istrong | 42 | med  |
| UNC_TS_BC17  | 4.75 | 0 | ER+ | LumA   | low  | istrong | 29 | low  |
| UNC_TS_BC170 | 3.67 | 0 | ER+ | Basal  | high | istrong | 67 | high |
| UNC_TS_BC171 | 6.42 | 0 | ER- | LumA   | low  | istrong | 28 | low  |
| UNC_TS_BC172 | 6.42 | 0 | ER+ | LumA   | low  | istrong | 22 | low  |
| UNC_TS_BC173 | 7.33 | 0 | ER+ | Her2   | low  | istrong | 49 | med  |
| UNC_TS_BC174 | 5.50 | 0 | ER- | Basal  | high | iweak   | 55 | high |
| UNC_TS_BC175 | 6.92 | 0 | ER+ | LumA   | high | iweak   | 29 | low  |
| UNC_TS_BC176 | 2.75 | 0 | ER+ | LumB   | high | istrong | 56 | high |
| UNC_TS_BC177 | 3.08 | 1 | ER+ | LumB   | high | iweak   | 68 | high |
| UNC_TS_BC178 | 7.33 | 0 | ER+ | Immuno | low  | iweak   | 21 | low  |
| UNC_TS_BC179 | 4.42 | 1 | ER+ | Her2   | high | istrong | 69 | high |
| UNC_TS_BC180 | 7.00 | 0 | ER+ | Basal  | high | iweak   | 81 | high |
| UNC_TS_BC181 | 7.17 | 0 | ER+ | Immuno | high | istrong | 56 | high |
| UNC_TS_BC182 | 7.08 | 0 | ER+ | Her2   | high | iweak   | 59 | high |
| UNC_TS_BC184 | 7.17 | 0 | ER+ | Immuno | low  | istrong | 54 | high |
| UNC_TS_BC185 | 6.33 | 0 | ER+ | LumA   | low  | iweak   | 32 | low  |
| UNC_TS_BC187 | 7.08 | 0 | ER+ | Basal  | high | iweak   | 84 | high |
| UNC_TS_BC188 | 7.17 | 0 | ER+ | Immuno | low  | istrong | 21 | low  |
| UNC_TS_BC189 | 7.08 | 0 | ER+ | LumA   | low  | iweak   | 27 | low  |
| UNC_TS_BC19  | 3.50 | 0 | ER+ | Her2   | high | istrong | 66 | high |
| UNC_TS_BC190 | 5.92 | 0 | ER+ | LumA   | low  | istrong | 28 | low  |
| UNC_TS_BC193 | 6.92 | 0 | ER+ | LumA   | low  | iweak   | 41 | med  |
| UNC_TS_BC194 | 0.58 | 1 | ER- | Basal  | high | iweak   | 58 | high |
| UNC_TS_BC195 | 7.00 | 0 | ER+ | Immuno | low  | istrong | 34 | med  |
| UNC_TS_BC196 | 3.08 | 0 | ER+ | LumA   | low  | istrong | 12 | low  |

|              |      |   |     |        |      |         |    |      |
|--------------|------|---|-----|--------|------|---------|----|------|
| UNC_TS_BC198 | 6.83 | 1 | ER+ | Her2   | high | iweak   | 56 | high |
| UNC_TS_BC202 | 7.75 | 0 | ER+ | Basal  | high | istrong | 92 | high |
| UNC_TS_BC203 | 6.00 | 0 | ER+ | Immuno | low  | istrong | 33 | med  |
| UNC_TS_BC205 | 7.25 | 0 | ER+ | LumA   | low  | istrong | 12 | low  |
| UNC_TS_BC206 | 7.58 | 0 | ER- | LumA   | low  | istrong | 35 | med  |
| UNC_TS_BC208 | 7.17 | 0 | ER- | Her2   | high | istrong | 48 | med  |
| UNC_TS_BC210 | 6.67 | 0 | ER+ | LumA   | low  | iweak   | 29 | low  |
| UNC_TS_BC212 | 7.08 | 0 | ER- | Basal  | high | istrong | 43 | med  |
| UNC_TS_BC213 | 6.75 | 0 | ER+ | LumB   | high | iweak   | 44 | med  |
| UNC_TS_BC214 | 3.17 | 0 | ER+ | LumA   | low  | istrong | 20 | low  |
| UNC_TS_BC216 | 7.00 | 0 | ER+ | Immuno | low  | istrong | 32 | low  |
| UNC_TS_BC218 | 7.42 | 0 | ER+ | LumA   | low  | istrong | 1  | low  |
| UNC_TS_BC219 | 6.25 | 0 | ER+ | LumA   | low  | iweak   | 19 | low  |
| UNC_TS_BC220 | 5.42 | 0 | ER+ | Immuno | low  | istrong | 37 | med  |
| UNC_TS_BC221 | 7.25 | 0 | ER+ | LumA   | low  | istrong | 23 | low  |
| UNC_TS_BC222 | 5.00 | 1 | ER+ | Her2   | high | iweak   | 79 | high |
| UNC_TS_BC223 | 4.83 | 0 | ER+ | LumA   | high | iweak   | 23 | low  |
| UNC_TS_BC224 | 5.83 | 0 | ER- | Basal  | high | iweak   | 56 | high |
| UNC_TS_BC227 | 7.58 | 0 | ER+ | Immuno | low  | istrong | 32 | low  |
| UNC_TS_BC228 | 7.00 | 0 | ER+ | LumA   | low  | istrong | 14 | low  |
| UNC_TS_BC231 | 7.50 | 0 | ER+ | Her2   | high | iweak   | 75 | high |
| UNC_TS_BC232 | 2.75 | 1 | ER+ | Immuno | low  | istrong | 28 | low  |
| UNC_TS_BC234 | 7.83 | 0 | ER+ | Immuno | high | istrong | 51 | high |
| UNC_TS_BC235 | 8.00 | 0 | ER+ | Basal  | low  | iweak   | 46 | med  |
| UNC_TS_BC237 | 8.08 | 0 | ER+ | LumB   | high | istrong | 48 | med  |
| UNC_TS_BC238 | 8.00 | 0 | ER- | Basal  | low  | istrong | 61 | high |
| UNC_TS_BC241 | 2.33 | 0 | ER- | Basal  | high | iweak   | 53 | high |
| UNC_TS_BC242 | 7.50 | 0 | ER+ | LumA   | low  | iweak   | 16 | low  |
| UNC_TS_BC243 | 8.17 | 0 | ER+ | LumA   | low  | istrong | 13 | low  |
| UNC_TS_BC244 | 0.08 | 1 | ER- | Her2   | low  | istrong | 63 | high |
| UNC_TS_BC245 | 7.75 | 0 | ER+ | LumA   | low  | istrong | 22 | low  |
| UNC_TS_BC246 | 3.08 | 1 | ER- | Basal  | low  | istrong | 67 | high |
| UNC_TS_BC248 | 1.67 | 1 | ER+ | Basal  | low  | iweak   | 57 | high |
| UNC_TS_BC249 | 8.25 | 0 | ER+ | Immuno | low  | istrong | 16 | low  |
| UNC_TS_BC250 | 0.17 | 0 | ER+ | LumB   | high | iweak   | 42 | med  |
| UNC_TS_BC251 | 1.58 | 0 | ER+ | LumA   | low  | iweak   | 20 | low  |
| UNC_TS_BC252 | 8.08 | 0 | ER+ | LumA   | low  | iweak   | 32 | low  |
| UNC_TS_BC254 | 8.17 | 0 | ER+ | Basal  | high | iweak   | 90 | high |
| UNC_TS_BC255 | 1.50 | 0 | ER- | Her2   | high | istrong | 50 | high |
| UNC_TS_BC257 | 7.83 | 0 | ER+ | LumA   | low  | iweak   | 45 | med  |
| UNC_TS_BC258 | 7.08 | 0 | ER+ | Basal  | high | istrong | 78 | high |
| UNC_TS_BC259 | 8.08 | 0 | ER+ | LumA   | low  | istrong | 27 | low  |
| UNC_TS_BC26  | 4.67 | 0 | ER+ | LumB   | high | istrong | 25 | low  |
| UNC_TS_BC265 | 2.42 | 0 | ER- | Her2   | high | iweak   | 63 | high |
| UNC_TS_BC267 | 1.75 | 0 | ER+ | LumA   | low  | istrong | 10 | low  |
| UNC_TS_BC268 | 4.92 | 0 | ER+ | LumB   | high | iweak   | 36 | med  |
| UNC_TS_BC269 | 7.83 | 0 | ER+ | LumA   | low  | iweak   | 13 | low  |

|              |       |   |     |        |      |         |    |      |
|--------------|-------|---|-----|--------|------|---------|----|------|
| UNC_TS_BC27  | 4.42  | 0 | ER+ | LumA   | low  | iweak   | 30 | low  |
| UNC_TS_BC270 | 4.58  | 1 | ER+ | LumB   | high | iweak   | 44 | med  |
| UNC_TS_BC271 | 0.83  | 0 | ER- | Basal  | high | istrong | 58 | high |
| UNC_TS_BC272 | 5.00  | 0 | ER- | Basal  | high | iweak   | 62 | high |
| UNC_TS_BC273 | 7.67  | 0 | ER+ | LumA   | low  | istrong | 10 | low  |
| UNC_TS_BC274 | 8.67  | 0 | ER+ | LumA   | low  | istrong | 25 | low  |
| UNC_TS_BC275 | 6.33  | 0 | ER+ | LumA   | low  | istrong | 19 | low  |
| UNC_TS_BC276 | 7.92  | 0 | ER+ | LumB   | high | istrong | 29 | low  |
| UNC_TS_BC277 | 6.75  | 0 | ER+ | LumA   | low  | iweak   | 44 | med  |
| UNC_TS_BC278 | 8.42  | 0 | ER+ | LumA   | low  | istrong | 2  | low  |
| UNC_TS_BC279 | 7.75  | 0 | ER- | Immuno | high | istrong | 32 | low  |
| UNC_TS_BC28  | 0.17  | 0 | ER+ | LumA   | low  | istrong | 54 | high |
| UNC_TS_BC283 | 8.50  | 0 | ER- | Basal  | high | istrong | 52 | high |
| UNC_TS_BC284 | 2.92  | 1 | ER+ | Basal  | high | istrong | 88 | high |
| UNC_TS_BC285 | 8.17  | 0 | ER- | Basal  | high | istrong | 52 | high |
| UNC_TS_BC287 | 7.00  | 0 | ER+ | Immuno | high | istrong | 56 | high |
| UNC_TS_BC289 | 5.25  | 0 | ER+ | Immuno | low  | istrong | 37 | med  |
| UNC_TS_BC29  | 4.33  | 0 | ER+ | LumA   | high | iweak   | 43 | med  |
| UNC_TS_BC290 | 8.00  | 0 | ER- | LumA   | low  | istrong | 30 | low  |
| UNC_TS_BC292 | 6.67  | 0 | ER+ | LumA   | low  | istrong | 23 | low  |
| UNC_TS_BC293 | 13.58 | 0 | ER+ | LumA   | low  | istrong | 9  | low  |
| UNC_TS_BC294 | 14.58 | 0 | ER+ | LumB   | high | iweak   | 71 | high |
| UNC_TS_BC295 | 12.58 | 0 | ER+ | LumA   | low  | iweak   | 31 | low  |
| UNC_TS_BC296 | 8.42  | 0 | ER+ | Basal  | high | istrong | 76 | high |
| UNC_TS_BC30  | 1.33  | 0 | ER+ | LumA   | low  | istrong | 31 | low  |
| UNC_TS_BC31  | 4.50  | 0 | ER+ | LumB   | high | iweak   | 60 | high |
| UNC_TS_BC32  | 5.00  | 0 | ER+ | Immuno | high | istrong | 37 | med  |
| UNC_TS_BC33  | 1.83  | 0 | ER+ | Her2   | high | istrong | 79 | high |
| UNC_TS_BC34  | 0.50  | 0 | ER+ | Her2   | high | istrong | 72 | high |
| UNC_TS_BC36  | 4.50  | 0 | ER- | Basal  | high | iweak   | 66 | high |
| UNC_TS_BC37  | 4.33  | 0 | ER+ | Immuno | low  | istrong | 34 | med  |
| UNC_TS_BC38  | 4.92  | 0 | ER- | LumA   | low  | iweak   | 40 | med  |
| UNC_TS_BC41  | 4.17  | 1 | ER- | Immuno | low  | istrong | 39 | med  |
| UNC_TS_BC42  | 4.08  | 0 | ER+ | LumB   | high | iweak   | 47 | med  |
| UNC_TS_BC45  | 5.00  | 0 | ER- | Immuno | low  | istrong | 59 | high |
| UNC_TS_BC46  | 5.08  | 0 | ER+ | LumB   | high | iweak   | 41 | med  |
| UNC_TS_BC47  | 4.83  | 0 | ER+ | LumB   | high | iweak   | 56 | high |
| UNC_TS_BC49  | 1.50  | 1 | ER+ | LumA   | low  | istrong | 50 | high |
| UNC_TS_BC52  | 5.50  | 0 | ER+ | LumA   | high | iweak   | 21 | low  |
| UNC_TS_BC53  | 5.58  | 0 | ER+ | LumA   | low  | iweak   | 23 | low  |
| UNC_TS_BC54  | 5.25  | 0 | ER+ | LumA   | low  | istrong | 28 | low  |
| UNC_TS_BC55  | 5.17  | 0 | ER+ | LumA   | low  | istrong | 15 | low  |
| UNC_TS_BC56  | 5.17  | 0 | ER+ | LumA   | low  | iweak   | 42 | med  |
| UNC_TS_BC57  | 5.67  | 0 | ER+ | Basal  | low  | iweak   | 54 | high |
| UNC_TS_BC58  | 4.17  | 0 | ER+ | LumA   | low  | iweak   | 32 | low  |
| UNC_TS_BC59  | 4.75  | 0 | ER+ | Immuno | high | istrong | 64 | high |
| UNC_TS_BC60  | 5.08  | 0 | ER+ | LumA   | low  | istrong | 21 | low  |



|             |       |   |     |       |      |         |    |      |
|-------------|-------|---|-----|-------|------|---------|----|------|
| UNC_TS_BC61 | 5.50  | 0 | ER- | Her2  | high | istrong | 43 | med  |
| UNC_TS_BC62 | 0.67  | 0 | ER+ | LumB  | high | iweak   | 43 | med  |
| UNC_TS_BC63 | 5.58  | 0 | ER+ | LumA  | low  | iweak   | 22 | low  |
| UNC_TS_BC66 | 3.50  | 1 | ER+ | LumA  | low  | istrong | 35 | med  |
| UNC_TS_BC67 | 5.33  | 0 | ER+ | LumA  | low  | iweak   | 18 | low  |
| UNC_TS_BC70 | 0.83  | 0 | ER+ | LumA  | low  | iweak   | 36 | med  |
| UNC_TS_BC72 | 5.33  | 0 | ER+ | LumA  | low  | iweak   | 8  | low  |
| UNC_TS_BC73 | 5.58  | 0 | ER- | Basal | high | istrong | 48 | med  |
| UNC_TS_BC74 | 5.58  | 0 | ER+ | LumB  | high | iweak   | 44 | med  |
| UNC_TS_BC75 | 1.25  | 1 | ER- | Basal | high | iweak   | 57 | high |
| UNC_TS_BC76 | 5.42  | 0 | ER+ | LumA  | low  | istrong | 36 | med  |
| UNC_TS_BC77 | 1.08  | 1 | ER- | Basal | high | iweak   | 61 | high |
| UNC_TS_BC78 | 4.50  | 0 | ER+ | LumA  | low  | iweak   | 21 | low  |
| UNC_TS_BC79 | 5.17  | 0 | ER- | Basal | high | iweak   | 55 | high |
| UNC_TS_BC81 | 2.50  | 0 | ER+ | LumB  | high | iweak   | 39 | med  |
| UNC_TS_BC82 | 2.00  | 0 | ER- | Basal | high | iweak   | 48 | med  |
| UNC_TS_BC84 | 1.50  | 0 | ER- | Basal | high | istrong | 36 | med  |
| UNC_TS_BC85 | 3.58  | 0 | ER+ | LumA  | low  | iweak   | 29 | low  |
| UNC_TS_BC86 | 5.92  | 0 | ER+ | LumA  | low  | iweak   | 15 | low  |
| UNC_TS_BC87 | 1.00  | 0 | ER+ | LumA  | low  | iweak   | 15 | low  |
| UNC_TS_BC88 | 5.58  | 0 | ER+ | LumA  | low  | iweak   | 50 | high |
| UNC_TS_BC90 | 0.08  | 1 | ER+ | LumB  | high | iweak   | 46 | med  |
| UNC_TS_BC91 | 5.75  | 0 | ER+ | LumB  | high | iweak   | 54 | high |
| UNC_TS_BC92 | 5.58  | 0 | ER- | Basal | high | istrong | 41 | med  |
| UNC_TS_BC93 | 5.33  | 0 | ER+ | LumA  | low  | iweak   | 10 | low  |
| UNC_TS_BC94 | 4.83  | 0 | ER+ | LumA  | low  | iweak   | 10 | low  |
| UNC_TS_BC95 | 5.42  | 0 | ER- | Basal | high | iweak   | 59 | high |
| UNC_TS_BC97 | 13.75 | 0 | ER- | Basal | high | istrong | 51 | high |
| UNC_TS_BC98 | 0.00  | 1 | ER- | Her2  | high | iweak   | 57 | high |

---
